**Title:** An inhibitor of apoptosis (SfIAP) interacts with SQUAMOSA promoter binding protein (SBP) transcription factors that exhibit pro-cell death characteristics

Ryan Kessens<sup>1</sup>, Nick Sorensen<sup>1</sup>, Mehdi Kabbage<sup>1\*</sup>

<sup>1</sup>Department of Plant Pathology, University of Wisconsin-Madison, Madison, WI 53706

**Email:** Ryan Kessens – [kessens@wisc.edu](mailto:kessens@wisc.edu); Nicholas Sorensen – [nicholas@teamsorensen.com](mailto:nicholas@teamsorensen.com) ;  
Mehdi Kabbage – [kabbage@wisc.edu](mailto:kabbage@wisc.edu)

**\*To whom correspondence should be addressed:** [kabbage@wisc.edu](mailto:kabbage@wisc.edu) - +1-608-262-0506

**Date of submission:** 02/17/2018

**Figures:** 9 figures; Fig.1 and Fig.3-9 should be color in print; Fig. 2 can be printed as black-and-white

**Tables:** 1 table

**Word count:** 6,253

**Supplementary data:** 3 Supplementary Figures; 1 Supplementary Table

## **Title : An inhibitor of apoptosis (SfIAP) interacts with SQUAMOSA promoter binding protein (SBP) transcription factors that exhibit pro-cell death characteristics**

**Running title:** SfIAP interacts with pro-cell death SBP transcription factors

**Highlights:** SBP transcription factors SlySBP8b and SlySBP12a from tomato interact with an insect inhibitor of apoptosis protein (SfIAP). Both exhibit pro-cell death characteristics while SlySBP12a activity may be regulated through ER membrane tethering.

### **Abstract**

Despite the functional conservation of programmed cell death (PCD) across broad evolutionary distances, an understanding of the molecular machinery underpinning this fundamental program in plants remains largely elusive. This is despite its critical importance to development, homeostasis, and proper responses to stress. Progress in plant PCD has been hindered by the fact that many core regulators of animal PCD are absent in plant genomes. Remarkably, numerous studies have shown that the ectopic expression of animal anti-PCD genes in plants can suppress cell death imposed by many stresses. In this study, we capitalize on the ectopic expression of an insect inhibitor of apoptosis (SfIAP) to identify novel cell death regulators in plants. A yeast two-hybrid assay was conducted using SfIAP as bait to screen a tomato cDNA library. This screen identified several transcription factors of the SQUAMOSA promoter binding protein (SBP) family as potential SfIAP binding partners. We confirmed this interaction *in vivo* for our top two interactors, SlySBP8b and SlySBP12a, using coimmunoprecipitation. Interestingly, overexpression of *SlySBP8b* and *SlySBP12a* induced spontaneous cell death in *Nicotiana benthamiana* leaves. Overexpression of these two transcription factors also induced the accumulation of reactive oxygen species and enhanced the growth of the necrotrophic pathogen *Alternaria alternata*. Fluorescence microscopy confirmed the nuclear localization of both SlySBP8b and SlySBP12a, while SlySBP12a was also localized to the ER membrane. These results support a pro-death role for SlySBP8b and SlySBP12a and provide potential targets that can be utilized to improve stress tolerance in crop plants.

**Key words:** *Alternaria alternata*, cell death, fumonisin B1, inhibitor of apoptosis, necrotrophic, SBP, SfiAP, SPL, SQUAMOSA promoter binding protein

**Abbreviations:** PCD, programmed cell death; IAP, inhibitor of apoptosis; BIR, baculovirus IAP repeat; RING, really interesting new gene; FB1, fumonisin B1; SBP, SQUAMOSA promoter binding protein; ROS, reactive oxygen species; 35S, cauliflower mosaic virus 35S promoter; HA, hemagglutinin; YFP, yellow fluorescent protein; DAB, 3,3'-Diaminobenzidine; QIS-Seq, quantitative interactor screen sequencing; CLSM, confocal laser scanning microscopy; DHE, dihydroethidium; NLS, nuclear localization signal; TMD, transmembrane domain; ER, endoplasmic reticulum; HR, hypersensitive response; MTTF, membrane-tethered transcription factor

## 1 **Introduction:**

2           Programmed cell death (PCD) is a fundamental aspect of development and stress  
3 response that is conserved throughout all kingdoms of life (Allocati *et al.*, 2015). This process of  
4 genetically controlled cellular suicide has been studied extensively in animal systems, and the  
5 results of these research efforts have led to major treatment advances for many human diseases  
6 (Fuchs and Steller, 2011). In contrast, our understanding of the biochemical pathways underlying  
7 PCD in plants is severely lacking. This is largely due to the absence of obvious orthologs of core  
8 regulators of apoptosis, a well-studied form of PCD in animals (Kabbage *et al.*, 2017). While this  
9 has undoubtedly slowed progress on plant PCD research, it has also presented a unique  
10 opportunity for the discovery of novel regulators of PCD in plant systems.

11           Apoptosis is a specific type of PCD characterized by distinct morphological and  
12 biochemical features (Kroemer *et al.*, 2009). Apoptotic cell death in animals is executed through  
13 the activation of cysteine-dependent aspartate-specific proteases termed caspases. Caspases exist  
14 as inactive pro-enzymes that can be activated by external or internal cellular cues. Once  
15 activated, caspases execute an orderly demise of the cell by targeting negative regulators of  
16 apoptosis, cytoskeletal components, and other caspases (Parrish *et al.*, 2013). Due to the terminal  
17 nature of apoptosis, caspases must be kept under multiple layers of regulation. The Inhibitor of  
18 Apoptosis (IAP) family is an important group of proteins that negatively regulate caspase  
19 activity. The defining feature of all IAPs is the presence of one or more Baculovirus IAP Repeat  
20 (BIR) domains, which confer substrate specificity (Verhagen *et al.*, 2001). Additionally, some  
21 IAPs contain a Really Interesting New Gene (RING) domain that serves as a functional E3  
22 ubiquitin ligase domain. Inhibitor of Apoptosis proteins can inhibit caspase activity by  
23 preventing pro-caspases from becoming active or by suppressing active caspases. This can be  
24 accomplished by simply blocking the active site pocket of a caspase or by utilizing the RING  
25 domain to ubiquitinate a caspase and mark it for proteasome-mediated degradation (Feltham *et*  
26 *al.*, 2012; Gyrd-Hansen and Meier, 2010).

27           Despite the fact that obvious orthologs of IAPs and caspases are absent in plant genomes,  
28 the ectopic expression of animal and viral apoptotic regulators in tobacco (*Nicotiana spp.*) and  
29 tomato (*Solanum lycopersicum*) modulate plant cell death. This was first reported nearly two  
30 decades ago when the expression of *Bax*, a mammalian pro-apoptotic gene absent in plant  
31 genomes, induced localized tissue collapse and cell death in *Nicotiana benthamiana* (Lacomme

32 and Santa Cruz, 1999). Shortly thereafter, Dickman *et al.* (2001) demonstrated that expression of  
33 a viral IAP (*OpIAP*), as well as anti-apoptotic members of the Bcl-2 family, conferred resistance  
34 to a suite of necrotrophic fungal pathogens in *Nicotiana tabacum*. Pathogens with a necrotrophic  
35 lifestyle require dead host tissue for nutrient acquisition and studies on *Cochliobolus victoriae*,  
36 *Sclerotinia sclerotiorum*, and *Fusarium* spp. revealed that these necrotrophic fungal pathogens  
37 hijack host cell death machinery to kill cells (Asai *et al.*, 2000; Glenn *et al.*, 2008; Kabbage *et*  
38 *al.*, 2013; Lorang *et al.*, 2012; Williams *et al.*, 2011).

39 More recently, we showed that overexpression of an IAP from *Spodoptera frugiperda*  
40 (fall armyworm; *SfIAP*) in tobacco and tomato prevented cell death associated with a wide range  
41 of abiotic and biotic stresses (Kabbage *et al.*, 2010; Li *et al.*, 2010). Tobacco and tomato lines  
42 expressing *SfIAP* had increased heat and salt stress tolerance, two abiotic stresses that induce cell  
43 death. These transgenic lines were also resistant to the fungal necrotroph *Alternaria alternata*  
44 and the mycotoxin fumonisin B1 (FB1) (Li *et al.*, 2010). Fumonisin B1 is produced by some  
45 species of *Fusarium* and is a potent inducer of apoptosis in animal cells and apoptotic-like PCD  
46 in plant cells (Gilchrist, 1997).

47 It has been over 15 years since it was first reported that overexpression of animal anti-  
48 apoptotic regulators in plants conferred enhanced resistance against a wide assortment of  
49 necrotrophic pathogens. During this time, numerous studies have confirmed the efficacy of  
50 animal apoptotic regulators in plants without identifying the means by which these regulators  
51 function. In this study, we used an unbiased approach to identify *in planta* binding partners of  
52 *SfIAP* in tomato to better understand how this insect IAP is able to inhibit cell death and confer  
53 stress tolerance in plants. Yeast two-hybrid and coimmunoprecipitation (CoIP) assays show that  
54 *SfIAP* interacts with members of the SQUAMOSA promoter binding protein (abbreviated SBP  
55 in tomato or SPL in some other species) transcription factor family. Overexpression of two  
56 tomato SBPs, *SlySBP8b* and *SlySBP12a*, induced cell death in tobacco leaves accompanied by  
57 enhanced production of reactive oxygen species (ROS). Overexpression of *SlySBP8b* and  
58 *SlySBP12a* also created an environment that was more conducive to the growth of the  
59 necrotrophic fungal pathogen *A. alternata*. In summary, our findings uncover *SlySBP8b* and  
60 *SlySBP12a* as novel *SfIAP* binding partners that exhibit pro-death attributes.

61

62

## 63 **Materials and Methods:**

64

### 65 *Plant material and growth conditions*

66 *Nicotiana benthamiana* plants were grown on a 16 h light cycle ( $\sim 50$  microeinsteins  $\text{m}^{-2} \text{s}^{-1}$ ) at  
67  $26^\circ \text{C}$  and  $\sim 60\%$  humidity. *Nicotiana glutinosa* (PI 555510) and tomato (*Solanum lycopersicum*  
68 cv. Bonny Best) plants were grown on a 16 h light cycle ( $\sim 100$  microeinsteins  $\text{m}^{-2} \text{s}^{-2}$ ) at  $22^\circ \text{C}$   
69 and  $\sim 60\%$  humidity. The soil composition for all plants consisted of SunGro® propagation mix  
70 and Sunshine® coarse vermiculite in a 3:1 ratio. Plants were watered with deionized water  
71 supplemented with Miracle-Gro® all-purpose fertilizer (1g/L) as needed.

72

### 73 *Plasmid construction*

74 The full-length open reading frames of *SlySBP-like* (Solyc07g062980), *SlySBP4*  
75 (Solyc07g053810), *SlySBP6a* (Solyc03g114850), *SlySBP6c* (Solyc12g038520), *SlySBP8b*  
76 (Solyc01g090730), and *SlySBP12a* (Solyc01g068100) were amplified by PCR from cDNA  
77 collected from tomato inflorescence tissue (Supplemental Table S1). AttB1 and attB2 adapters  
78 were added to forward and reverse primers, respectively, to generate attB-flanked amplicons  
79 suitable for Gateway™ Recombination Cloning (Invitrogen).

80 Amplicons were recombined into the entry vector pDONR™/Zeo using BP clonase II  
81 (Invitrogen). *SlySBP8b(NLS<sub>mt</sub>)* and *SlySBP12a(NLS<sub>mt</sub>)* constructs were generated using the Q5®  
82 Site-Directed Mutagenesis Kit (New England Biolabs). *SlySBP12a(ΔTMD)* and *TMD<sub>SlySBP12a</sub>*  
83 were amplified from *SlySBP12a* in pDONR™/Zeo using the primers indicated in Supplementary  
84 Table S1 and recombined into pDONR™/Zeo. For overexpression in *N. benthamiana* leaves and  
85 tomato protoplasts, entry vectors were mixed with the desired pEarleyGate destination vectors  
86 (Earley *et al.*, 2006) and recombined using LR clonase II (Invitrogen). pEarleyGate vectors drive  
87 transgene expression using a cauliflower mosaic virus 35S (35S) promoter and were used to  
88 generate N-terminal yellow fluorescent protein (YFP; pEarleyGate104) or N-terminal influenza  
89 hemagglutinin (HA; pEarleyGate201) fusions. All constructs were verified using Sangar  
90 sequencing before being transformed into *Agrobacterium tumefaciens* GV3101.

91 Plasmids for the yeast two-hybrid screen were prepared as follows. *SfIAP*, *SfIAP<sub>BIR1</sub>*, and  
92 *luciferase* cDNAs were cloned into the bait vector pGilda under control of the *GAL1* promoter

93 and in-frame with an N-terminal fusion of the *E. coli* LexA DNA binding protein (Takara Bio  
94 USA, Inc.). *Luciferase* (firefly luciferase from *Photinus pyralis*) was cut from an existing  
95 plasmid using a 5'-NcoI restriction site in the START codon and a 3'-NotI restriction site  
96 outside of the ORF and ligated into pGilda. Primers for *SfIAP* (GenBank: AF186378.1) and  
97 *SfIAP<sub>BIRI</sub>* amplification were designed to place an EcoRI site at the 5' end and a BamHI site at  
98 the 3' end of the ORF. Primers used for amplification can be found in Supplementary Table S1.  
99 Amplicons were cut using these restriction enzymes and ligated into pGilda. Tomato cDNAs  
100 were expressed from the *GALI* promoter with an N-terminal fusion of the B42 activation protein  
101 in the pB42AD plasmid (Takara Bio USA, Inc.). Bait and prey library were sequentially  
102 transformed into EGY48 yeast using standard protocols.

103

#### 104 *Yeast two-hybrid screening*

105 Yeast containing bait and plasmid were plated on SD galactose (-His/-Trp/-Leu) to induce gene  
106 expression and select for bait-prey interactions. After incubating at 28°C for ~5 days, colonies  
107 were pooled in 10 mL of sorbitol/phosphate buffer (1.2 M sorbitol, 0.1 M NaPO<sub>4</sub>, pH 7.5) per  
108 plate, pelleted, and resuspended in 2 mL of sorbitol/phosphate buffer supplemented with 500 U  
109 of lyticase (Sigma: L2524-25KU) and 250 µg of RNase A. Yeast cells were incubated in the  
110 lyticase buffer for 3 h at 37°C prior to plasmid recovery. Plasmid DNA was extracted using a  
111 Wizard Plus SV Miniprep kit (Promega) and a modified protocol. Briefly, 2.5 mL of lysis  
112 solution and 80 uL of alkaline protease solution were added to yeast protoplasts and incubated at  
113 room temperature for 10 mins. Next, 3.5 mL of neutralization solution was added and cellular  
114 debris was pelleted by centrifugation. Supernatant was run through the provided columns and  
115 plasmid DNA eluted according to the manufacturer's instructions. Low-cycle PCR was  
116 performed to amplify cDNA's from the prey library. Briefly, MyFi™ proofreading DNA  
117 polymerase (Bioline) and pB42AD forward and reverse primers (flanking the cDNA insertion  
118 site of pB42AD) were used to amplify cDNA's (Supplementary Table S1). A QIAquick PCR  
119 purification kit (Qiagen) was used to clean PCR products before sequencing.

120

121

#### 122 *Illumina sequencing and data analysis*



123 Sequencing was performed by the Biotechnology Center at UW-Madison using Illumina Next  
124 Generation sequencing with 100 bp paired-end reads. The sequencing data were uploaded to the  
125 Galaxy web platform, and we used the public server at *usegalaxy.org* to analyze the data (Afgan  
126 *et al.*, 2016). Reads were groomed and trimmed to remove low quality bases and adapter  
127 sequences before alignment (Bolger *et al.*, 2014). Bait (pGilda) and prey (pB42AD) plasmid  
128 sequences were concatenated with the *Saccharomyces cerevisiae* reference genome  
129 (S288C\_reference\_sequence\_R64-2-1\_20150113) to create a FASTA file containing sources of  
130 plasmid and gDNA contamination. Reads were aligned to this file using Bowtie 2 (Langmead  
131 and Salzberg, 2012). Aligned reads (plasmid and gDNA) were discarded while unaligned reads  
132 were aligned to the tomato reference genome (Solgenomics: ITAG2.4) with Bowtie 2. Cufflinks  
133 (v2.2.1) was used to assemble transcripts from these aligned reads and calculate FPKM values  
134 for each locus (Trapnell *et al.*, 2012). Enrichment scores for each locus were calculated using R  
135 Studio and scripts written in-house (RStudio Team, 2016). Details of Galaxy pipeline, in-house  
136 scripts, and complete dataset are available upon request.

137

### 138 *Transient expression in N. benthamiana and N. glutinosa*

139 Agrobacterium strain GV3101 was grown overnight in liquid LB supplemented with gentamycin  
140 and kanamycin (50 µg/mL) at 28°C with shaking. Cells were harvested by centrifugation,  
141 washed once with sterile deionized water, and resuspended in infiltration medium (10 mM  
142 MgSO<sub>4</sub>, 9 mM MES, 10 mM MgCl<sub>2</sub>, 300 µM acetosyringone, pH 5.7) to a final concentration of  
143 OD<sub>600</sub> = 0.9. Cultures were incubated at room temperature for 4 h before infiltration. *Nicotiana*  
144 *benthamiana* plants were infiltrated with a 1-mL needleless syringe at 4-5 weeks of age with the  
145 two youngest and easily infiltratable leaves being used. *Nicotiana glutinosa* plants were  
146 infiltrated at 5-6 weeks of age with a single leaf being used on each plant, typically  
147 corresponding to the 4<sup>th</sup> or 5<sup>th</sup> true leaf. Plants were transformed at different ages due to  
148 differences in rate of growth between the two species.

149 For total protein extraction, leaf tissue was frozen in liquid nitrogen and ground in 3x  
150 Laemmli buffer (10% β-mercaptoethanol). Samples were boiled for 10 minutes followed by  
151 centrifugation at 10,000 g for 5 min. Supernatants were removed and transferred to new tubes.  
152 Total proteins were separated by electrophoresis on a 12% Tris-Glycine-SDS polyacrylamide gel  
153 (BioRad). Proteins were transferred to a nitrocellulose membrane. Total protein was detected



154 using Ponceau S stain. Epitope-tagged proteins were detected by probing with  $\alpha$ -GFP (Cell  
155 Signaling 2955S) or  $\alpha$ -HA (Cell Signaling 3724S) primary antibodies. The  $\alpha$ -GFP antibody was  
156 detected using goat  $\alpha$ -mouse IgG conjugated to horseradish peroxidase (HRP) (Cell Signaling  
157 7076P2) while the  $\alpha$ -HA antibody was detected using goat  $\alpha$ -rabbit IgG conjugated to HRP (Cell  
158 Signaling 7074P2). Amersham<sup>TM</sup> ECL<sup>TM</sup> reagent (GE Life Sciences) was used to detect HRP-  
159 conjugated antibodies.

160

### 161 *Transient transfection of tomato protoplasts*

162 Mesophyll protoplasts from tomato cotyledons were isolated from 10 day-old plants using the  
163 Tape Sandwich method (Wu *et al.*, 2009). A total of 6  $\mu$ g of plasmid was used for each  
164 transfection with an equal ratio used for cotransfections. Transfections were performed using  
165 polyethylene glycol (PEG) as described previously (Yoo *et al.*, 2007). Protoplasts were used for  
166 imaging the day after transfection.

167

### 168 *Coimmunoprecipitation assays*

169 Agrobacterium strains harboring free *35S:YFP* or *35S:YFP-SfIAP<sup>M4</sup>* (I332A) were coinfiltrated  
170 with strains harboring *35S:HA-SlySBP8b* or *35S:HA-SlySBP12a*. A 7:2 ratio of YFP strains to  
171 HA strains was used due to relatively low accumulation of YFP-SfIAP<sup>M4</sup> (I332A) protein  
172 compared to HA-SlySBP8b and HA-SlySBP12a. Approximately 40 h post-agroinfiltration,  
173 transformed leaves were collected and ground in liquid nitrogen to a fine powder. Extraction  
174 buffer (150 mM Tris-HCl, 150 mM NaCl, 5 mM EDTA, 0.2% IGEPAL, and 1% plant protease  
175 inhibitor cocktail [Sigma]) was added at a concentration of 2 mL/g of leaf tissue. YFP-tagged  
176 proteins were immunoprecipitated by incubating the lysate with  $\alpha$ -GFP magnetic agarose beads  
177 (GFP-Trap\_MA; Chromotek) for 2 h at 4<sup>o</sup> C. Beads were washed three times in extraction buffer  
178 (w/o IGEPAL) and boiled in 30  $\mu$ L of 2x SDS loading buffer before loading on duplicate 12%  
179 Tris-Glycine-SDS polyacrylamide gels (BioRad). Proteins were transferred to duplicate  
180 nitrocellulose membranes and probed with  $\alpha$ -GFP (Cell Signaling 2955S) or  $\alpha$ -HA (Cell  
181 Signaling 3724S) primary antibodies. The  $\alpha$ -GFP antibody was detected using goat  $\alpha$ -mouse IgG  
182 conjugated to HRP (Cell Signaling 7076P2) while the  $\alpha$ -HA antibody was detected using goat  $\alpha$ -

183 rabbit IgG conjugated to HRP (Cell Signaling 7074P2). Amersham™ ECL™ reagent (GE Life  
184 Sciences) was used to detect HRP-conjugated antibodies.

185

### 186 *Confocal laser scanning microscopy*

187 Confocal laser scanning microscopy was performed on a Zeiss ELYRA LSM780 inverted  
188 confocal microscope using a 40x, 1.1-numerical aperture, water objective. YFP fusions,  
189 chlorophyll autofluorescence, and DHE were excited with a 488 nm argon laser. YFP emission  
190 was detected between 502-542 nm, chlorophyll emission was detected between 657-724 nm, and  
191 DHE was detected between 606-659 nm. mCherry was excited with a 561 nm He-Ne laser and  
192 emission was detected between 606-651 nm.

193

### 194 *Electrolyte leakage analysis*

195 Cell death progression in *N. benthamiana* leaves was assessed by measuring ion leakage.  
196 Approximately 24 h post-agroinfiltration, eight leaf discs were collected from two leaves on the  
197 same plant and pooled into a single well of a 12-well plate. Leaf discs were washed for 30 min in  
198 4 mL of deionized water by rotating plates at 50 rpm at room temperature. Wash water was  
199 removed and replaced with 4 mL of fresh deionized water. Immediately after adding fresh water,  
200 the conductivity of the solution was recorded, representing the 24 h post-agroinfiltration  
201 measurement. The conductivity of the water was measured using an ECTestr 11<sup>+</sup> MultiRange  
202 conductivity meter (Oakton) at the indicated time points.

203

### 204 *DAB staining of N. benthamiana leaves*

205 Staining solution was prepared by dissolving 3,3'-Diaminobenzidine (DAB; Sigma) in HCl at  
206 pH 2. Once dissolved, this solution was added to Na<sub>2</sub>HPO<sub>4</sub> buffer (10 mM) for a final DAB  
207 concentration of 1 mg/mL. Tween-20 (0.05% v/v) was added and the final pH was adjusted to  
208 7.2. Whole leaves were collected, placed in petri dishes, submerged in DAB staining solution,  
209 and vacuum infiltrated. Plates were covered in aluminum foil and incubated at room temperature  
210 with shaking. After 4 hours, DAB staining solution was removed and replaced with clearing  
211 solution A (25% acetic acid, 75% ethanol). Leaves were heated at 80°C for 10 minutes to  
212 remove chlorophyll. Clearing solution A was removed and replaced with clearing solution B

213 (15% acetic acid, 15% glycerol, 70% ethanol). Leaves were incubated in clearing solution B  
214 overnight at room temperature to remove residual chlorophyll.

215

### 216 *A. alternata* inoculation of *N. glutinosa* leaves

217 *Alternaria alternata* isolated from potato was provided by Dr. Amanda Gevens (University of  
218 Wisconsin, Madison, WI). Leaves were harvested from *N. glutinosa* plants one day post-  
219 agroinfiltration. For FB1 treatments, leaves were coinfiltrated with an Agrobacterium suspension  
220 containing the *35S:YFP* construct and 5  $\mu$ M FB1 (Cayman Chemicals). Detached leaves were  
221 placed adaxial-side up in petri dishes (100 mm x 20 mm) containing 3 layers of wet filter paper.  
222 Five-mm-diameter agar plugs were collected from the edge of an actively growing fungal colony  
223 on potato dextrose agar. Leaves were wounded with a 1 mL pipette tip along the midrib and agar  
224 plugs were placed fungal-side-down on top of the wound. Inoculated leaves were kept at room  
225 temperature (~23°C) for the duration of the experiment.

226

### 227 *Image acquisition and analysis*

228 All leaf images were taken using a Nikon D5500 camera with a Nikon AF-S NIKKOR 18-55  
229 mm lens. Quantification of DAB staining intensity and fungal growth was performed using the  
230 Fiji package for ImageJ (Schindelin *et al.*, 2012). For quantification of DAB staining intensity,  
231 the Colour Deconvolution package was used to isolate the DAB color channel for each DAB-  
232 stained leaf (Ruifrok and Johnston, 2001). Staining intensity caused by *35S:YFP* expression on  
233 the left half of each leaf was subtracted from the staining intensity caused by *35S:HA-SlySBP8b*  
234 or *35S:HA-SlySBP12a* expression on the right half of the same leaf. Fungal lesions were  
235 quantified by tracing the periphery of the lesion and calculating the area within the periphery  
236 using ImageJ. Statistical analyses were performed using a one-way analysis of variance  
237 (ANOVA) with Tuckey's honest significant difference (HSD) test in R Studio (RStudio Team,  
238 2016).

239

240

241

242

## 243 **Results:**

### 244 *Identification of SfiAP binding partners in tomato*

245 To identify putative binding partners of SfiAP from tomato, we performed a yeast two-hybrid  
246 assay coupled with next-generation sequencing using a method developed by Lewis *et al.* (2012)  
247 termed quantitative interactor screen sequencing (QIS-Seq). This method enables the entire pool  
248 of interactors to be sequenced by pooling all yeast colonies together instead of individually  
249 sequencing each colony using Sangar sequencing. The high throughput nature of QIS-Seq  
250 proved useful for screening multiple baits, including a negative control, against the library as  
251 well as sequencing the entire cDNA library itself (Supplementary Fig. S1A.).

252 SfiAP contains two BIR domains and a C-terminal RING domain. The BIR1 domain and  
253 the RING domain are essential for complete SfiAP function in plants while the BIR2 domain is  
254 dispensable (Kabbage *et al.*, 2010). Full-length SfiAP and the BIR1 domain alone (SfiAP<sub>BIR1</sub>)  
255 were used as bait to screen a tomato cDNA library produced under stressed conditions. The  
256 SfiAP<sub>BIR1</sub> construct was used to prolong transient interactions that can occur upon ubiquitination  
257 of substrates by the RING domain of full-length SfiAP. Luciferase served as a negative control  
258 to account for non-specific protein interactions and potential autoactivation of the selectable  
259 marker. The cDNA library itself was also sequenced to account for biases in transcript  
260 abundance.

261 Enrichment scores were calculated for each locus using the equation in Supplementary  
262 Fig. S1B. A total of 13 putative interactors with enrichment scores of 50 or higher were  
263 identified in our screen (Table 1). Interestingly, this list contained six members of the  
264 SQUAMOSA promoter binding protein (SBP) family of transcription factors. Based on  
265 enrichment scores, the top interactor with full-length SfiAP was SlySBP8b (95.7) while the top  
266 interactor with SfiAP<sub>BIR1</sub> was SlySBP12a (98.7). Also present at lower enrichments were  
267 SlySBP4, -6a, -6c, and an unannotated homolog referred to as SlySBP-like (Table 1).

268

### 269 *Induction of tissue death by SlySBP8b and SlySBP12a*

270 SfiAP is known to inhibit apoptosis in *S. frugiperda* and suppress cell death when  
271 ectopically expressed in plants. Thus, we anticipated that SfiAP-interacting partners in plants  
272 may be positive regulators of cell death. To narrow our list of candidate genes, we transiently

273 overexpressed cDNA clones of each tomato SBP identified from our yeast two-hybrid screen in  
274 *N. benthamiana* leaves and monitored these leaves for signs of tissue death. The generated  
275 cassettes contained an N-terminal hemagglutinin (HA) tag and were driven by a cauliflower  
276 mosaic virus 35S promoter (35S). At 5 days post-transformation, tissue collapse induced by  
277 *35S:HA-SlySBP8b* expression and a lesion-mimic phenotype induced by *35S:HA-SlySBP12a*  
278 expression could clearly be seen (Fig. 1A). However, overexpression of the other *SlySBPs* failed  
279 to produce any visible signs of tissue death. Immunoblots using an  $\alpha$ -HA antibody confirmed  
280 protein accumulation for all constructs (Fig. 1B). These results show that at least two SfiAP  
281 interactors induce clear signs of cell death upon overexpression in *N. benthamiana*.

282

### 283 *SlySBP8b and SlySBP12a interact with SfiAP<sup>M4</sup> (I332A) in-planta*

284 Due to the strong tissue death phenotype associated with the overexpression of *SlySBP8b* and  
285 *SlySBP12a*, we focused our subsequent efforts on these two SBP variants. For *in vivo*  
286 confirmation of the yeast two-hybrid results, we performed coimmunoprecipitation (CoIP)  
287 assays in *N. benthamiana* leaves. A truncated version of SfiAP beginning at the 4<sup>th</sup> methionine  
288 residue was used as our bait. This version maintains its function in *S. frugiperda* cells but lacks a  
289 caspase recognition site that is typically cleaved in *S. frugiperda* (Cerio *et al.*, 2010). This is  
290 particularly important since we show that cleavage at the N-terminus of the full-length protein  
291 occurs in *N. benthamiana*, thus removing N-terminal epitope tags (Supplementary Fig. S2). To  
292 prolong transient interactions that may take place between SfiAP and its targets following  
293 ubiquitination, an E3 ligase mutant of the truncated SfiAP protein was used by mutating a  
294 conserved residue in the RING domain (Cerio *et al.*, 2010). This construct, referred to as  
295 SfiAP<sup>M4</sup>(I332A), is resistant to N-terminal cleavage in *N. benthamiana* (Supplementary Fig. S2).

296 Two days after coexpression of *35S:YFP-SfiAP<sup>M4</sup>(I332A)* with *35S:HA-SlySBP8b* or  
297 *35S:HA-SlySBP12a*, total proteins were extracted from leaves and incubated with GFP-  
298 Trap\_MA beads (Chromotek, Germany). All proteins were detected in the input fraction, and  
299 HA-SlySBP8b and HA-SlySBP12a were successfully pulled-down by YFP-SfiAP<sup>M4</sup>(I332A) but  
300 not by free YFP (Fig. 2). These data confirm the yeast two-hybrid results and demonstrate that  
301 SfiAP<sup>M4</sup>(I332A) interacts with *SlySBP8b* and *SlySBP12a* in plant cells.

302

### 303 *Role of SlySBP8b and SlySBP12a localization in cell death induction*

304 As putative transcription factors, we reasoned that SlySBP8b and SlySBP12a function in the  
305 nucleus and nuclear localization would be required to regulate genes involved in cell death  
306 induction. Additionally, a predicted bi-partite nuclear localization signal (NLS) is present in the  
307 SBP domain of all tomato SBP transcription factors (Salinas *et al.*, 2012). Localization was  
308 assessed by expressing *35S:YFP-SlySBP8b* and *35S:YFP-SlySBP12a* in tomato mesophyll  
309 protoplasts. Confocal laser scanning microscopy (CLSM) revealed that both YFP-SlySBP8b and  
310 YFP-SlySBP12a colocalized with the nuclear marker dihydroethidium (DHE) (Fig. 3). To  
311 further substantiate the role of nuclear localization in cell death induction, site-directed  
312 mutagenesis was used to substitute conserved lysine and arginine residues in the NLS with  
313 leucine (Supplementary Fig. S3). Overexpression of the two NLS mutants, *35S:HA-*  
314 *SlySBP8b(NLS<sub>ml</sub>)* and *35S:HA-SlySBP12a(NLS<sub>ml</sub>)*, in *N. benthamiana* leaves did not induce  
315 visible signs of cell death (Fig. 4A). Immunoblots performed on tissues overexpressing both the  
316 wild-type and NLS mutants confirmed that protein accumulation was not greatly affected by  
317 mutations in the NLS (Fig. 4B). Thus, nuclear localization of these two transcription factors is  
318 required for cell death to occur.

319 While YFP-SlySBP8b was found to be strictly nuclear-localized, YFP-SlySBP12a was  
320 also localized to diffuse pockets outside of the nucleus (Fig. 3). The presence of a putative C-  
321 terminal transmembrane domain (TMD) in SlySBP12a (Supplementary Fig. S3) suggested that  
322 this localization pattern could be due to the anchoring of SlySBP12a to a cellular membrane.  
323 Removal of the last 73 amino acids of SlySBP12a eliminated the putative TMD and resulted in  
324 complete localization of YFP-SlySBP12a( $\Delta$ TMD) to the nucleus (Fig. 3; Fig. 5). Additionally,  
325 overexpression of *35S:HA-SlySBP12a( $\Delta$ TMD)* in *N. benthamiana* caused enhanced cell death  
326 characterized by extensive tissue collapse at the site of transgene expression and increased  
327 electrolyte leakage compared to the full-length construct (Fig. 6A and 6B). The TMD of  
328 SlySBP12a may thus regulate its access to the nucleus and the subsequent induction of cell  
329 death.

330 To determine the membrane localization of SlySBP12a, the last 73 amino acids of the  
331 protein containing the putative TMD were fused to the C-terminal end of YFP (YFP-  
332 TMD<sub>SlySBP12a</sub>) (Supplementary Fig. S3). This construct was expressed in *N. benthamiana* where  
333 it localized to the periphery of epidermal cells and a ring-like structure around the nucleus that  
334 resembled endoplasmic reticulum (ER) localization (Fig. 5). Endoplasmic reticulum localization



335 was confirmed in tomato protoplasts, where the YFP-TMD<sub>SlySBP12a</sub> fusion colocalized with the  
336 ER marker SP-mCherry-HDEL (Fig. 7). This ER marker consists of the fluorescent protein  
337 mCherry with a signal peptide at its N-terminus and an ER retention motif at its C-terminus  
338 (Nelson *et al.*, 2007). We were also able to show colocalization between the full-length YFP-  
339 SlySBP12a construct and the ER marker in tomato protoplasts (Fig. 7). These results confirm  
340 that SlySBP12a contains a functional TMD that integrates the full-length protein into the ER  
341 membrane.

342

### 343 *ROS production and fungal growth in leaves overexpressing SlySBP8b and* 344 *SlySBP12a*

345 Reactive oxygen species (ROS) are important cell death intermediaries, and their accumulation is  
346 a key feature of cell death imposed by necrotrophic fungal pathogens and the death-inducing  
347 toxins they produce (Heller and Tudzynski, 2011; Kim *et al.*, 2008; Sakamoto *et al.*, 2005; Shi *et*  
348 *al.*, 2007). Following transient expression in *N. benthamiana* leaves, we monitored the  
349 accumulation of hydrogen peroxide (H<sub>2</sub>O<sub>2</sub>) for four days using 3',3'-diaminobenzidine (DAB)  
350 staining. Leaves expressing *35S:HA-SlySBP8b* and *35S:HA-SlySBP12a* displayed enhanced  
351 DAB staining intensity relative to expression of the *35S:YFP* control on the same leaf (Fig. 8A).  
352 Accumulation of H<sub>2</sub>O<sub>2</sub> occurred as early as 2 and 3 days post-transformation for *35S:HA-*  
353 *SlySBP8b* and *35S:HA-SlySBP12a*, respectively (Fig. 8B). ImageJ software was used to measure  
354 DAB staining intensity (Schindelin *et al.*, 2012).

355 Transgenic *SfIAP* plants were reported to accumulate lower levels of ROS under stress  
356 conditions compared to wild-type plants (Li *et al.*, 2010). Necrotrophic fungal pathogens are  
357 known to exploit host ROS production as means to kill host cells for their own benefit (Govrin  
358 and Levine, 2000; Heller and Tudzynski, 2011; Kabbage *et al.*, 2013; Ranjan *et al.*, 2017). In  
359 addition to reduced ROS accumulation, transgenic *SfIAP* plants are also resistant to the  
360 necrotrophic fungal pathogen *A. alternata* (Li *et al.*, 2010). Therefore, we reasoned that leaves  
361 overexpressing *SlySBP8b* and *SlySBP12a* would support enhanced growth of this pathogen.  
362 Unfortunately, *N. benthamiana* is not susceptible to this pathogen, so we screened *Nicotiana*  
363 germplasm for susceptible species (data not shown). We found that *Nicotiana glutinosa* was  
364 susceptible to *A. alternata* and previous work confirmed that transgenes could be expressed



365 effectively in this species using *Agrobacterium*-mediated transient transformation (Kessens *et*  
366 *al.*, 2014).

367 While the differences were small, a total of 54 biological replicates from four randomized  
368 and blind experiments showed that leaves expressing *35S:YFP-SlySBP8b* or *35S:YFP-*  
369 *SlySBP12a* had increased *A. alternata* lesion areas compared to leaves expressing *35S:YFP* alone  
370 (Fig. 9A and 9B). This effect was more pronounced with *35S:YFP-SlySBP12a* than with  
371 *35S:YFP-SlySBP8b* expression. As a positive control, leaves were treated with 5  $\mu$ M FB1 to  
372 simulate cell death induction by a fungal toxin. Lesion development in *35S:YFP-SlySBP12a-*  
373 expressing tissue and FB1-treated tissue was comparable (Fig. 9B). Fluorescence microscopy  
374 was used to confirm protein accumulation in each leaf before fungal inoculation and *35S:YFP-*  
375 *SlySBP8b* and *35S:YFP-SlySBP12a* were able to induce tissue death in *N. glutinosa* (data not  
376 shown). Lesion areas were measured using ImageJ software (Schindelin *et al.*, 2012). Overall,  
377 we show that these two transcription factors are able to increase ROS levels and promote *A.*  
378 *alternata* growth, phenotypes that are dampened in plants expressing *SfIAP*.

379

## 380 Discussion

381 The first report of cell death suppression by heterologous expression of a viral IAP  
382 (*OpIAP*) in tobacco occurred almost two decades ago. *OpIAP* expression prevented cell death  
383 imposed by the necrotrophic fungal pathogen *S. sclerotiorum* and the necrosis-inducing viral  
384 pathogen tomato spotted wilt virus (Dickman *et al.*, 2001). Subsequent studies revealed that an  
385 IAP from *Spodoptera frugiperda* (SfIAP) suppressed cell death imposed by numerous abiotic  
386 and biotic stresses (Hoang *et al.*, 2014; Kabbage *et al.*, 2010; Li *et al.*, 2010). However, the  
387 biochemical mechanism by which these IAPs suppress cell death in plant systems remains  
388 unknown. In this study, we utilize SfIAP as a tool to identify novel pro-death regulators and  
389 provide a biochemical context for SfIAP function in plants.

390

391 *SlySBP8b* and *SlySBP12a* associate with *SfIAP*<sup>M4</sup>(I332A) and exhibit  
392 characteristics of pro-death regulators

393 The yeast two-hybrid and CoIP data presented clearly show that *SlySBP8b* and  
394 *SlySBP12a* associate with *SfIAP*<sup>M4</sup>(I332A) (Table 1 & Fig. 2). Remarkably, *SlySBP8b* and

395 *SlySBP12a* exhibit attributes of pro-death regulators, demonstrated by cell death induction and  
396 ROS accumulation upon overexpression (Fig. 1 and Fig. 8). We anticipated that coexpression of  
397 *SfIAP* with *SlySBP8b* or *SlySBP12a* would suppress cell death induction. However, numerous  
398 attempts to suppress cell death induced by *SlySBP8b* and *SlySBP12a* through *SfIAP* or *SfIAP<sup>M4</sup>*  
399 coexpression were unsuccessful (data not shown). One possible explanation is the fact that  
400 *SlySBP8b* and *SlySBP12a* accumulate at higher levels compared to *SfIAP* and *SfIAP<sup>M4</sup>*, thus  
401 largely escaping *SfIAP* regulation. An excess of either transcription factor could allow enough to  
402 enter the nucleus and influence cell death gene expression.

403 *SlySBP8b* and *SlySBP12a* belong to a family of plant-specific transcription factors  
404 known as SQUAMOSA promoter binding proteins (SBPs), of which 15 members are present in  
405 tomato (Salinas *et al.*, 2012). Members of this family are defined by a highly conserved SBP-box  
406 DNA binding domain and can be further divided into 9 phylogenetically distinct clades (Preston  
407 and Hileman, 2013; Yamasaki *et al.*, 2013). *SBP* genes are known to regulate diverse  
408 developmental processes such as flowering time, branching, trichome development, apical  
409 dominance, and pollen sac development to name a few (Wang and Wang, 2015; Yamasaki *et al.*,  
410 2013). Interestingly, silencing of the *SBP* gene *Colorless non-ripening (Cnr)* in tomato results in  
411 fruit with delayed ripening, a phenotype observed in tomatoes overexpressing *SfIAP* (Li *et al.*,  
412 2010; Manning *et al.*, 2006).

413 While much is known about the role of SBP transcription factors in plant development,  
414 only a few studies to date have associated SBPs with stress responses. The deletion of  
415 Arabidopsis *SPL14 (AtSPL14)* conferred enhanced tolerance to FB1, thus implicating this SBP  
416 transcription factor in the cellular response to this mycotoxin (Stone *et al.*, 2005). Tolerance to  
417 FB1 is a phenotype that we have also observed in *SfIAP*-overexpressing tomato seedlings (Li *et*  
418 *al.*, 2010). Interestingly, *AtSPL14* and *SlySBP12a* both reside in clade-II and display similar  
419 structural characteristics with large SBP proteins that contain a predicted C-terminal  
420 transmembrane domain (Preston and Hileman, 2013).

421 Another clade-II member, *GmSPL12l* from soybean, was shown to be a target of the  
422 *Phakopsora pachyrhizi* (Asian soybean rust) effector PpEC23 (Qi *et al.*, 2016). This effector  
423 suppressed the hypersensitive response (HR) in soybean and tobacco and also interacted with  
424 other clade-II members from *N. benthamiana* and Arabidopsis: *NbSPL1* and *AtSPL1* (Qi *et al.*,  
425 2016). In another study, the N immune receptor of *N. benthamiana* was found to associate with

426 the SBP transcription factor NbSPL6 upon activation of HR. This interaction only occurred when  
427 plants were challenged with an HR-eliciting strain of tobacco mosaic virus (TMV-U1) but not a  
428 non-eliciting strain (TMV-Ob) (Padmanabhan *et al.*, 2013). Taken together, our results and the  
429 findings of previous studies clearly show that SBP transcription factors are critical regulators of  
430 plant stress responses that result in cell death.

431 Fungal pathogens with a necrotrophic lifestyle are known to exploit host ROS production  
432 for cell death induction and successful pathogenesis (Govrin and Levine, 2000; Heller and  
433 Tudzynski, 2011). As positive regulators of cell death and ROS production, we hypothesized that  
434 overexpression of *SlySBP8b* and *SlySBP12a* would support enhanced growth of necrotrophic  
435 fungal pathogens. Additionally, *SfIAP* transgenic plants are resistant to cell death induced by the  
436 necrotrophic fungal pathogen *A. alternata* (Li *et al.*, 2010). The results of four randomized and  
437 blind experiments clearly show that while the contribution of *SlySBP8b* or *SlySBP12a*  
438 overexpression to *A. alternata* lesion areas was small, it was significantly greater than leaves  
439 expressing the negative control *35S:YFP* (Fig. 9). The small differences in growth could be  
440 explained by the fact that *A. alternata* is already an aggressive pathogen and the benefits of  
441 priming its host for death would be small. To test this, we also treated leaves with FB1, which is  
442 a structural analog of the AAL toxin produced by *A. alternata* f. sp. *lycopersici* that induces cell  
443 death in tomato (Mirocha *et al.*, 1992). Pre-treatment of *N. glutinosa* leaves with FB1 led to  
444 enhanced growth of *A. alternata* comparable to *SlySBP12a* overexpression (Fig. 9). These results  
445 provide further evidence that *SlySBP8b* and *SlySBP12a* are positive regulators of cell death,  
446 which in this case, contribute to pathogenic development of *A. alternata*.

447

#### 448 *Nuclear localization of SlySBP8b and SlySBP12a is required for cell death*

449 As members of a transcription factor family, we hypothesized that *SlySBP8b* and  
450 *SlySBP12a* exert their pro-death activity in the nucleus. We show that these transcription factors  
451 are clearly localized to the nucleus of tomato protoplasts (Fig. 3) and mutation of the bi-partite  
452 NLS of both transcription factors abolishes cell death (Fig. 4). These results support our  
453 hypothesis that *SlySBP8b* and *SlySBP12a* function in the nucleus, possibly through the  
454 regulation of genes involved in cell death. Future studies should focus on identifying the genes  
455 regulated by *SlySBP8b* and *SlySBP12a*, as this may provide further information on the  
456 downstream components responsible for cell death execution in plants.

457

### 458 *SlySBP12a localizes to the ER*

459 Unlike SlySBP8b, which we found to be strictly nuclear localized, SlySBP12a was also  
460 present outside of the nucleus (Fig. 3 and Fig. 5). By fusing the putative C-terminal TMD of  
461 SlySBP12a to YFP, we were able to show that the TMD of SlySBP12a localized YFP around the  
462 nucleus and at the periphery of *N. benthamiana* epidermal cells (Fig. 5). We hypothesized that  
463 this pattern was due to ER localization. This was confirmed in tomato protoplasts, where both  
464 YFP-SlySBP12a and YFP-TMD<sub>SlySBP12a</sub> co-localize with the ER marker SP-mCherry-HDEL  
465 (Fig. 7).

466 In response to environmental stress, plant cells increase production of secreted proteins,  
467 which in turn can cause ER stress due to the sudden influx of proteins that must be properly  
468 folded before moving through the rest of the secretory pathway (Eichmann and Schafer, 2012).  
469 This makes the ER an important sensor of cellular stress as the accumulation of unfolded  
470 proteins is first detected by the ER. Membrane-tethered transcription factors (MTTFs) residing at  
471 the ER membrane play important roles in ER stress perception and regulation of genes involved  
472 in stress relief and cell death in mammalian and plant systems (Slabaugh and Brandizzi, 2011).  
473 Membrane tethering provides spatial regulation of transcription factor activity, as MTTFs must  
474 be removed from the membrane before the transcription factor domain can translocate to the  
475 nucleus (Slabaugh and Brandizzi, 2011). This type of regulation allows these transcription  
476 factors to act quickly in response to cellular stress.

477 In this study, we show that SlySBP12a exhibits a localization pattern similar to  
478 previously described ER-MTTFs from Arabidopsis: NAC089, bZIP28, and bZIP60. These  
479 transcription factors are activated upon perception of ER stress and activate cell death  
480 (NAC089), heat stress (bZIP28), and ER stress (bZIP60) responses through transcriptional  
481 regulation of genes involved in these processes (Gao *et al.*, 2008; Iwata and Koizumi, 2005; Liu  
482 *et al.*, 2007; Yang *et al.*, 2014). Removal of the TMD from these transcription factors results in  
483 their complete localization to the nucleus and constitutive activation of the processes they  
484 regulate (Gao *et al.*, 2008; Iwata and Koizumi, 2005; Liu *et al.*, 2007; Yang *et al.*, 2014). This  
485 mirrors what we have observed with SlySBP12a. Removal of the TMD results in complete  
486 nuclear localization in *N. benthamiana* and tomato cells and enhanced cell death induction  
487 compared to full-length SlySBP12a (Fig. 3, Fig. 5, and Fig. 6).

488           With our data and previous studies of ER-MTTFs, we can speculate that SlySBP12a is  
489           cleaved from the ER membrane upon stress perception and translocates to the nucleus where it  
490           regulates genes involved in cell death. However, we must keep in mind that our experiments  
491           were performed with a cDNA copy of SlySBP12a, preventing the detection of splice-isoforms  
492           that could lack the TMD. This is important to consider as bZIP60 was originally thought to be  
493           proteolytically cleaved from the ER membrane upon stress induced by tunicamycin treatment  
494           (Iwata *et al.*, 2008). A follow-up study by the same group showed that in addition to being  
495           proteolytically cleaved, bZIP60 is also alternatively spliced in response to tunicamycin  
496           treatment, resulting in a truncated protein lacking the C-terminal TMD (Nagashima *et al.*, 2011).  
497           Future experiments looking at the translocation of SlySBP12a upon stress induction must  
498           consider the possibility of alternative splice isoforms.

499

## 500 **Conclusion**

501           While the expression of *IAP* and other anti-apoptotic genes in plants confer enhanced  
502           stress tolerance, the animal-derived nature of these genes will likely prohibit their broad  
503           commercial use. Thus, the identification of endogenous plant cell death regulators, such as SBP  
504           transcription factors, that can be targeted to ameliorate stress tolerance is appealing. This is  
505           exemplified by recent interest in exploiting *SBP* genes for crop improvement due to the many  
506           developmental traits they regulate (Liu *et al.*, 2016; Wang and Wang, 2015). Efforts are  
507           underway in our lab to determine whether the disruption of these transcription factors impact  
508           tolerance to a range of abiotic and biotic insults.

509

## 510 **Supplementary Data:**

511 **Table S1.** List of primers used in this study.

512 **Fig. S1.** Summary of the QIS-Seq approach used to identify SflAP-interacting partners.

513 **Fig. S2.** Western blot confirming SflAP<sup>M4</sup>(I332A) is not cleaved at its N-terminus.

514 **Fig. S3.** Diagram of wild-type and mutant SlySBP8b and SlySBP12a constructs used in this  
515           study.

516

## 517 **Acknowledgements:**

518 We would like to thank Andrew Bent and members of his lab for their valuable insight and  
519 shared lab resources. The *Alternaria alternata* isolate used was provided by Shunping Ding of  
520 Amanda Gevens' lab (University of Wisconsin-Madison). Next-generation sequencing for the  
521 yeast two-hybrid assay was performed by the Biotechnology Center at UW-Madison. Tomato  
522 protoplasts were generated with assistance from Stacy Anderson of Donna Fernandez's lab  
523 (University of Wisconsin-Madison). Confocal microscopy was performed at the Newcomb  
524 Imaging Center at UW-Madison. *Nicotiana glutinosa* seeds were obtained from the U.S.  
525 Nicotiana Germplasm Collection donated by the University of California-Berkeley. R.K. is  
526 supported by a National Institutes of Health National Research Service Award T32 GM007215.  
527 This work was supported by a United States Department of Agriculture (USDA) Hatch award  
528 (WIS01818) to M.K.

529

## References:

- Afgan E, Baker D, van den Beek M, Blankenberg D, Bouvier D, Cech M, Chilton J, Clements D, Coraor N, Eberhard C, Gruning B, Guerler A, Hillman-Jackson J, Von Kuster G, Rasche E, Soranzo N, Turaga N, Taylor J, Nekrutenko A, Goecks J.** 2016. The Galaxy platform for accessible, reproducible and collaborative biomedical analyses: 2016 update. *Nucleic Acids Res* **44**, W3-W10.
- Allocati N, Masulli M, Di Ilio C, De Laurenzi V.** 2015. Die for the community: an overview of programmed cell death in bacteria. *Cell Death Dis* **6**, e1609.
- Asai T, Stone JM, Heard JE, Kovtun Y, Yorgey P, Sheen J, Ausubel FM.** 2000. Fumonisin B1-induced cell death in arabidopsis protoplasts requires jasmonate-, ethylene-, and salicylate-dependent signaling pathways. *Plant Cell* **12**, 1823-1836.
- Bolger AM, Lohse M, Usadel B.** 2014. Trimmomatic: a flexible trimmer for Illumina sequence data. *Bioinformatics* **30**, 2114-2120.
- Cerio RJ, Vandergaast R, Friesen PD.** 2010. Host insect inhibitor-of-apoptosis SfiAP functionally replaces baculovirus IAP but is differentially regulated by Its N-terminal leader. *J Virol* **84**, 11448-11460.



- Dickman MB, Park YK, Oltersdorf T, Li W, Clemente T, French R.** 2001. Abrogation of disease development in plants expressing animal antiapoptotic genes. *Proc Natl Acad Sci U S A* **98**, 6957-6962.
- Earley KW, Haag JR, Pontes O, Opper K, Juehne T, Song K, Pikaard CS.** 2006. Gateway-compatible vectors for plant functional genomics and proteomics. *Plant J* **45**, 616-629.
- Eichmann R, Schafer P.** 2012. The endoplasmic reticulum in plant immunity and cell death. *Front Plant Sci* **3**, 200.
- Feltham R, Khan N, Silke J.** 2012. IAPS and ubiquitylation. *IUBMB Life* **64**, 411-418.
- Fuchs Y, Steller H.** 2011. Programmed Cell Death in Animal Development and Disease. *Cell* **147**, 742-758.
- Gao H, Brandizzi F, Benning C, Larkin RM.** 2008. A membrane-tethered transcription factor defines a branch of the heat stress response in *Arabidopsis thaliana*. *Proc Natl Acad Sci U S A* **105**, 16398-16403.
- Gilchrist DG.** 1997. Mycotoxins reveal connections between plants and animals in apoptosis and ceramide signaling. *Cell Death Differ* **4**, 689-698.
- Glenn AE, Zitomer NC, Zimeri AM, Williams LD, Riley RT, Proctor RH.** 2008. Transformation-mediated complementation of a FUM gene cluster deletion in *Fusarium verticillioides* restores both fumonisin production and pathogenicity on maize seedlings. *Mol Plant Microbe Interact* **21**, 87-97.
- Govrin EM, Levine A.** 2000. The hypersensitive response facilitates plant infection by the necrotrophic pathogen *Botrytis cinerea*. *Curr Biol* **10**, 751-757.
- Gyrd-Hansen M, Meier P.** 2010. IAPs: from caspase inhibitors to modulators of NF-kappaB, inflammation and cancer. *Nat Rev Cancer* **10**, 561-574.
- Heller J, Tudzynski P.** 2011. Reactive oxygen species in phytopathogenic fungi: signaling, development, and disease. *Annu Rev Phytopathol* **49**, 369-390.
- Hoang TML, Williams B, Khanna H, Dale J, Mundree SG.** 2014. Physiological basis of salt stress tolerance in rice expressing the antiapoptotic gene SflAP. *Functional Plant Biology* **41**, 1168.
- Iwata Y, Fedoroff NV, Koizumi N.** 2008. *Arabidopsis* bZIP60 is a proteolysis-activated transcription factor involved in the endoplasmic reticulum stress response. *Plant Cell* **20**, 3107-3121.



- Iwata Y, Koizumi N.** 2005. An Arabidopsis transcription factor, AtbZIP60, regulates the endoplasmic reticulum stress response in a manner unique to plants. *Proc Natl Acad Sci U S A* **102**, 5280-5285.
- Kabbage M, Kessens R, Bartholomay LC, Williams B.** 2017. The Life and Death of a Plant Cell. *Annu Rev Plant Biol* **68**, 375-404.
- Kabbage M, Li W, Chen S, Dickman MB.** 2010. The E3 ubiquitin ligase activity of an insect anti-apoptotic gene (SfIAP) is required for plant stress tolerance. *Physiological and Molecular Plant Pathology* **74**, 351-362.
- Kabbage M, Williams B, Dickman MB.** 2013. Cell Death Control: The Interplay of Apoptosis and Autophagy in the Pathogenicity of *Sclerotinia sclerotiorum*. *PLOS Pathogens* **9**, e1003287.
- Kessens R, Ashfield T, Kim SH, Innes RW.** 2014. Determining the GmRIN4 requirements of the soybean disease resistance proteins Rpg1b and Rpg1r using a nicotiana glutinosa-based agroinfiltration system. *PLoS One* **9**, e108159.
- Kim KS, Min JY, Dickman MB.** 2008. Oxalic acid is an elicitor of plant programmed cell death during *Sclerotinia sclerotiorum* disease development. *Mol Plant Microbe Interact* **21**, 605-612.
- Kroemer G, Galluzzi L, Vandenabeele P, Abrams J, Alnemri ES, Baehrecke EH, Blagosklonny MV, El-Deiry WS, Golstein P, Green DR, Hengartner M, Knight RA, Kumar S, Lipton SA, Malorni W, Nunez G, Peter ME, Tschopp J, Yuan J, Piacentini M, Zhivotovsky B, Melino G.** 2009. Classification of cell death: recommendations of the Nomenclature Committee on Cell Death 2009. *Cell Death Differ* **16**, 3-11.
- Lacomme C, Santa Cruz S.** 1999. Bax-induced cell death in tobacco is similar to the hypersensitive response. *Proc Natl Acad Sci U S A* **96**, 7956-7961.
- Langmead B, Salzberg SL.** 2012. Fast gapped-read alignment with Bowtie 2. *Nat Methods* **9**, 357-359.
- Lewis JD, Wan J, Ford R, Gong Y, Fung P, Nahal H, Wang PW, Desveaux D, Guttman DS.** 2012. Quantitative Interactor Screening with next-generation Sequencing (QIS-Seq) identifies *Arabidopsis thaliana* MLO2 as a target of the *Pseudomonas syringae* type III effector HopZ2. *BMC Genomics* **13**, 8.

- Li W, Kabbage M, Dickman MB.** 2010. Transgenic expression of an insect inhibitor of apoptosis gene, SflAP, confers abiotic and biotic stress tolerance and delays tomato fruit ripening. *Physiological and Molecular Plant Pathology* **74**, 363-375.
- Liu JX, Srivastava R, Che P, Howell SH.** 2007. An endoplasmic reticulum stress response in Arabidopsis is mediated by proteolytic processing and nuclear relocation of a membrane-associated transcription factor, bZIP28. *Plant Cell* **19**, 4111-4119.
- Liu Q, Harberd Nicholas P, Fu X.** 2016. SQUAMOSA Promoter Binding Protein-like Transcription Factors: Targets for Improving Cereal Grain Yield. *Molecular Plant* **9**, 765-767.
- Lorang J, Kidarsa T, Bradford CS, Gilbert B, Curtis M, Tzeng SC, Maier CS, Wolpert TJ.** 2012. Tricking the guard: exploiting plant defense for disease susceptibility. *Science* **338**, 659-662.
- Manning K, Tor M, Poole M, Hong Y, Thompson AJ, King GJ, Giovannoni JJ, Seymour GB.** 2006. A naturally occurring epigenetic mutation in a gene encoding an SBP-box transcription factor inhibits tomato fruit ripening. *Nat Genet* **38**, 948-952.
- Mirocha CJ, Gilchrist DG, Shier WT, Abbas HK, Wen Y, Vesonder RF.** 1992. AAL toxins, fumonisins (biology and chemistry) and host-specificity concepts. *Mycopathologia* **117**, 47-56.
- Nagashima Y, Mishiba K, Suzuki E, Shimada Y, Iwata Y, Koizumi N.** 2011. Arabidopsis IRE1 catalyses unconventional splicing of bZIP60 mRNA to produce the active transcription factor. *Sci Rep* **1**, 29.
- Nelson BK, Cai X, Nebenfuhr A.** 2007. A multicolored set of in vivo organelle markers for colocalization studies in Arabidopsis and other plants. *Plant J* **51**, 1126-1136.
- Padmanabhan MS, Ma S, Burch-Smith TM, Czymmek K, Huijser P, Dinesh-Kumar SP.** 2013. Novel positive regulatory role for the SPL6 transcription factor in the N TIR-NB-LRR receptor-mediated plant innate immunity. *PLoS Pathog* **9**, e1003235.
- Parrish AB, Freel CD, Kornbluth S.** 2013. Cellular mechanisms controlling caspase activation and function. *Cold Spring Harb Perspect Biol* **5**.
- Preston JC, Hileman LC.** 2013. Functional Evolution in the Plant SQUAMOSA-PROMOTER BINDING PROTEIN-LIKE (SPL) Gene Family. *Front Plant Sci* **4**, 80.
- Qi M, Link TI, Muller M, Hirschburger D, Pudake RN, Pedley KF, Braun E, Voegelé RT, Baum TJ, Whitham SA.** 2016. A Small Cysteine-Rich Protein from the Asian Soybean Rust Fungus, *Phakopsora pachyrhizi*, Suppresses Plant Immunity. *PLoS Pathog* **12**, e1005827.

- Ranjan A, Jayaraman D, Grau C, Hill JH, Whitham SA, Ane JM, Smith DL, Kabbage M.** 2017. The pathogenic development of *Sclerotinia sclerotiorum* in soybean requires specific host NADPH oxidases. *Mol Plant Pathol*.
- RStudio Team.** 2016. RStudio: Integrated Development for R. Boston, MA: RStudio, Inc.
- Ruifrok AC, Johnston DA.** 2001. Quantification of histochemical staining by color deconvolution. *Anal Quant Cytol Histol* **23**, 291-299.
- Sakamoto M, Tada Y, Nakayashiki H, Tosa Y, Mayama S.** 2005. Two phases of intracellular reactive oxygen species production during victorin-induced cell death in oats. *Journal of General Plant Pathology* **71**, 387-394.
- Salinas M, Xing S, Hohmann S, Berndtgen R, Huijser P.** 2012. Genomic organization, phylogenetic comparison and differential expression of the SBP-box family of transcription factors in tomato. *Planta* **235**, 1171-1184.
- Schindelin J, Arganda-Carreras I, Frise E, Kaynig V, Longair M, Pietzsch T, Preibisch S, Rueden C, Saalfeld S, Schmid B, Tinevez JY, White DJ, Hartenstein V, Eliceiri K, Tomancak P, Cardona A.** 2012. Fiji: an open-source platform for biological-image analysis. *Nat Methods* **9**, 676-682.
- Shi L, Bielawski J, Mu J, Dong H, Teng C, Zhang J, Yang X, Tomishige N, Hanada K, Hannun YA, Zuo J.** 2007. Involvement of sphingoid bases in mediating reactive oxygen intermediate production and programmed cell death in Arabidopsis. *Cell Res* **17**, 1030-1040.
- Slabaugh E, Brandizzi F.** 2011. Membrane-tethered transcription factors provide a connection between stress response and developmental pathways. *Plant Signal Behav* **6**, 1210-1211.
- Stone JM, Liang X, Neel ER, Stiers JJ.** 2005. Arabidopsis AtSPL14, a plant-specific SBP-domain transcription factor, participates in plant development and sensitivity to fumonisin B1. *Plant J* **41**, 744-754.
- Trapnell C, Roberts A, Goff L, Pertea G, Kim D, Kelley DR, Pimentel H, Salzberg SL, Rinn JL, Pachter L.** 2012. Differential gene and transcript expression analysis of RNA-seq experiments with TopHat and Cufflinks. *Nat Protoc* **7**, 562-578.
- Verhagen AM, Coulson EJ, Vaux DL.** 2001. Inhibitor of apoptosis proteins and their relatives: IAPs and other BIRPs. *Genome Biol* **2**, REVIEWS3009.
- Wang H, Wang H.** 2015. The miR156/SPL Module, a Regulatory Hub and Versatile Toolbox, Gears up Crops for Enhanced Agronomic Traits. *Mol Plant* **8**, 677-688.

- Williams B, Kabbage M, Kim H-J, Britt R, Dickman MB.** 2011. Tipping the Balance: Sclerotinia sclerotiorum Secreted Oxalic Acid Suppresses Host Defenses by Manipulating the Host Redox Environment. *PLOS Pathogens* **7**, e1002107.
- Wu F-H, Shen S-C, Lee L-Y, Lee S-H, Chan M-T, Lin C-S.** 2009. Tape-Arabidopsis Sandwich - a simpler Arabidopsis protoplast isolation method. *Plant Methods* **5**, 16.
- Yamasaki K, Kigawa T, Seki M, Shinozaki K, Yokoyama S.** 2013. DNA-binding domains of plant-specific transcription factors: structure, function, and evolution. *Trends Plant Sci* **18**, 267-276.
- Yang ZT, Wang MJ, Sun L, Lu SJ, Bi DL, Sun L, Song ZT, Zhang SS, Zhou SF, Liu JX.** 2014. The membrane-associated transcription factor NAC089 controls ER-stress-induced programmed cell death in plants. *PLoS Genet* **10**, e1004243.
- Yoo SD, Cho YH, Sheen J.** 2007. Arabidopsis mesophyll protoplasts: a versatile cell system for transient gene expression analysis. *Nat Protoc* **2**, 1565-1572.

**Table 1:** Enriched genes identified from QIS-Seq using full-length SfiAP or the BIR1 domain alone as bait.

| Locus ID       | Annotation              | FPKM values |            |         | Enrichment |
|----------------|-------------------------|-------------|------------|---------|------------|
|                |                         | SfiAP       | Luciferase | Library |            |
| Solyc01g090730 | SlySBP8b                | 66124.2     | 1434.5     | 13.2    | 95.7       |
| Solyc02g071010 | Chlorophyll a/b binding | 52964.4     | 765.5      | 4551.3  | 89.6       |
| Solyc05g005560 | BURP-domain containing  | 94.9        | 2.5        | 9.3     | 86.6       |
| Solyc03g114850 | SlySBP6a                | 626.3       | 44.6       | 1.1     | 86.6       |
| Solyc07g062980 | SlySBP-like             | 1489.9      | 294.3      | 6.9     | 66.8       |
| Solyc12g038520 | SlySBP6c                | 43.2        | 8.85       | 2.3     | 63.2       |
| Solyc07g053810 | SlySBP4                 | 576.7       | 171.2      | 11.0    | 53.4       |

| Locus ID       | Annotation               | FPKM values           |            |         | Enrichment |
|----------------|--------------------------|-----------------------|------------|---------|------------|
|                |                          | SfiAP <sub>BIR1</sub> | Luciferase | Library |            |
| Solyc01g068100 | SlySBP12a                | 7378.1                | 42.8       | 12.1    | 98.7       |
| Solyc06g073090 | Ribosomal sub. interface | 5669.4                | 196.7      | 61.1    | 92.3       |
| Solyc01g080020 | Xylanase inhibitor       | 85.7                  | 4.4        | 7.0     | 83.7       |
| Solyc01g090690 | Elongation factor G      | 28.4                  | 1.3        | 3.2     | 82.4       |
| Solyc01g090730 | SlySBP8b                 | 14122.1               | 1434.5     | 13.2    | 81.5       |
| Solyc01g094200 | NAD-dep. malic enzyme    | 54.5                  | 2.0        | 9.4     | 79.7       |
| Solyc12g038520 | SlySBP6c                 | 69.2                  | 8.9        | 2.3     | 75.0       |
| Solyc07g053810 | SlySBP4                  | 1031.9                | 171.2      | 11.0    | 70.9       |
| Solyc07g062980 | SlySBP-like              | 1257.7                | 294.3      | 6.9     | 61.8       |
| Solyc01g009750 | Unknown Protein          | 69.1                  | 10.2       | 33.2    | 52.4       |

\* FPKM – fragments per kilobase per million reads

## Figure legends

**Fig. 1.** Cell death induced by overexpression of *SlySBP* transcription factors in *N. benthamiana*. Enriched *SlySBP* transcription factors from the yeast two-hybrid assay were transiently overexpressed in *N. benthamiana*. (A) The left half of each leaf was transformed with free *YFP* as a negative control while the right half was transformed with the corresponding *SlySBP* gene containing an N-terminal HA tag and 35S promoter. Images were taken 5 days post-transformation. (B) A Western blot was performed on tissue collected 2 days post-transformation to confirm accumulation of *SlySBP* proteins. Proteins were detected using an  $\alpha$ -HA antibody.

**Fig. 2.** Coimmunoprecipitation of SfiAP<sup>M4</sup> (I332A) with *SlySBP8b* and *SlySBP12a* in *N. benthamiana*. *35S:YFP-SfiAP<sup>M4</sup> (I332A)* or free *YFP* was transiently coexpressed with *35S:HA-SlySBP8b* or *35S:HA-SlySBP12a* in *N. benthamiana* leaves. Proteins were immunoprecipitated with an  $\alpha$ -YFP affinity matrix. A portion of each sample was taken before immunoprecipitation to serve as the input control. An immunoblot was performed on input and elution fractions using the indicated antibodies to detect the epitope-tagged proteins.

**Fig. 3.** Nuclear localization of *SlySBP8b*, *SlySBP12a*, and *SlySBP12a*( $\Delta$ TMD) in tomato protoplasts. Tomato protoplasts were transfected with plasmids encoding *35S:YFP-SlySBP8b*, *35S:YFP-SlySBP12a*, or *35S:YFP-SlySBP12a*( $\Delta$ TMD) and imaged by CLSM. Dihydroethidium (red) was used as a nuclear counterstain while the magenta signal represents chloroplast autofluorescence.

**Fig. 4.** Disruption of the NLS in *SlySBP8b* and *SlySBP12a* prevents cell death in *N. benthamiana* upon overexpression. *35S:HA-SlySBP8b*, *35S:HA-SlySBP8b(NLS<sub>mt</sub>)*, *35S:HA-SlySBP12a*, or *35S:HA-SlySBP12a(NLS<sub>mt</sub>)* were transiently transformed in *N. benthamiana*. (A) Images of leaves taken 5 days post-transformation. (B) Immunoblot performed on tissue collected 2 days post-transformation. An  $\alpha$ -HA antibody was used to detect *SlySBP* proteins and Ponceau S stain was used to detect Rubisco as a loading control.

**Fig. 5.** Localization of *SlySBP12a*, TMD<sub>*SlySBP12a*</sub>, and *SlySBP12a*( $\Delta$ TMD) in *N. benthamiana* epidermal cells. Leaves were transiently transformed with *35S:YFP-SlySBP12a*, *35S:YFP-SlySBP12a*( $\Delta$ TMD), *35S:YFP-TMD<sub>SlySBP12a</sub>*, or *35S:YFP* and imaged using CLSM two days post-transformation. The dashed-line box in each panel is magnified and displayed in the upper-right corner of each panel. Chlorophyll autofluorescence is shown in magenta.

**Fig. 6.** Removal of the TMD from *SlySBP12a* results in enhanced cell death upon overexpression. *35S:HA-SlySBP12a*, *35S:HA-SlySBP12a*( $\Delta$ TMD) or *35S:YFP* were transiently transformed in *N. benthamiana*. (A) Images of leaves taken 5 days post-transformation. (B) Electrolyte leakage assay used to quantify cell death. *35S:YFP* – blue diamond; *35S:HA-SlySBP12a* – red square; *35S:HA-SlySBP12a*( $\Delta$ TMD) – green triangle. Three independent experiments with similar results were pooled together for a total of 22 biological replicates for each gene. Error bars represent a 95% confidence interval.

**Fig. 7.** Endoplasmic reticulum localization of SlySBP12a and TMD<sub>SlySBP12a</sub> in tomato protoplasts. Tomato protoplasts were transfected with plasmids encoding 35S:YFP-SlySBP12a or 35S:YFP-TMD<sub>SlySBP12a</sub> and imaged by CLSM. An SP-mCherry-HDEL construct was co-transfected to serve as an ER marker (red). The magenta signal represents chloroplast autofluorescence.

**Fig. 8.** Overexpression of *SlySBP8b* and *SlySBP12a* in *N. benthamiana* induces H<sub>2</sub>O<sub>2</sub> accumulation. 35S:HA-SlySBP8b and 35S:HA-SlySBP12a were transiently transformed in *N. benthamiana*. Leaves were cleared and stained with DAB to detect H<sub>2</sub>O<sub>2</sub>. (A) Images of leaves before and after DAB staining taken 4 days post-agroinfiltration. (B) Quantification of DAB-stained area for each *SlySBP* relative to YFP expression on the same leaf. ImageJ was used to analyze 16 leaves for each gene at each time point. All data points are displayed as a dotplot with the medians represented by black horizontal lines. Statistical significance compared to day 1 was determined using a one-way ANOVA with Tukey's HSD post-hoc test (\* P < 0.01; \*\* P < 0.001).

**Fig. 9.** Overexpression of *SlySBP8b* and *SlySBP12a* enhances *A. alternata* growth on *N. glutinosa*. 35S:YFP-SlySBP8b, 35S:YFP-SlySBP12a, or 35S:YFP were transiently transformed in *N. glutinosa*. As a positive control for cell death induction, leaves were treated with 5 μM FB1. Agar plugs containing actively growing *A. alternata* mycelium were placed fungal-side-down on leaves. (A) Quantification of lesion area using ImageJ. The results of 4 randomized and blind experiments were pooled representing 54 leaves for each treatment. All data points are displayed as a dotplot with the medians represented by red horizontal lines. Treatments with the same letter are not statistically significant as determined by a one-way ANOVA with Tukey's HSD post-hoc test (YFP/SBP8b, P = 0.02; YFP/SBP12a, P = 2.0E-7; YFP/FB1, P = 5.0 E-7; SBP8b/SBP12a, P = 0.02; SBP8b/FB1, P = 0.04). (B) Images of inoculated leaves with lesions outlined by a dotted white line.



**Fig. 1**

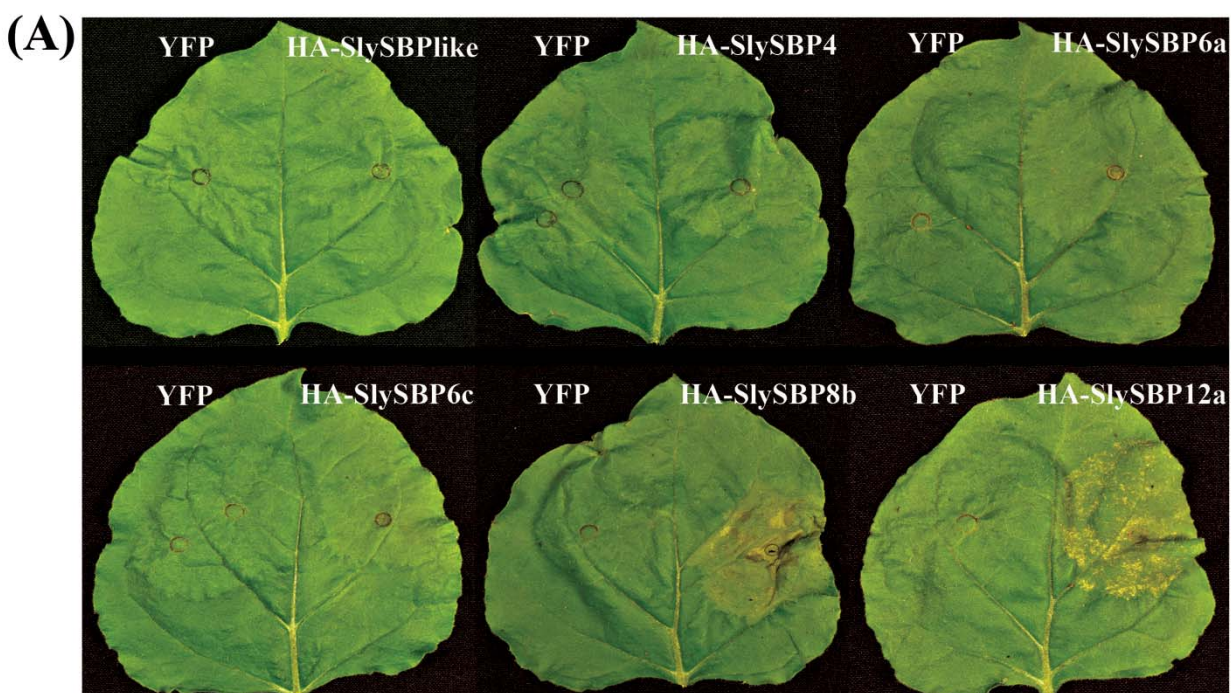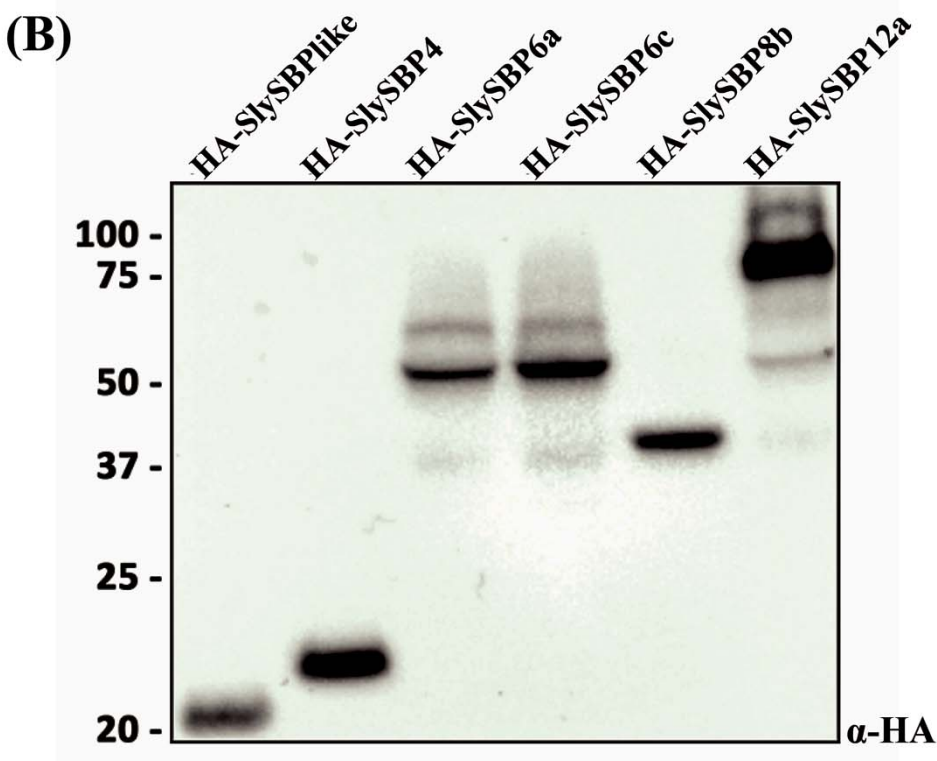

**Fig. 2**

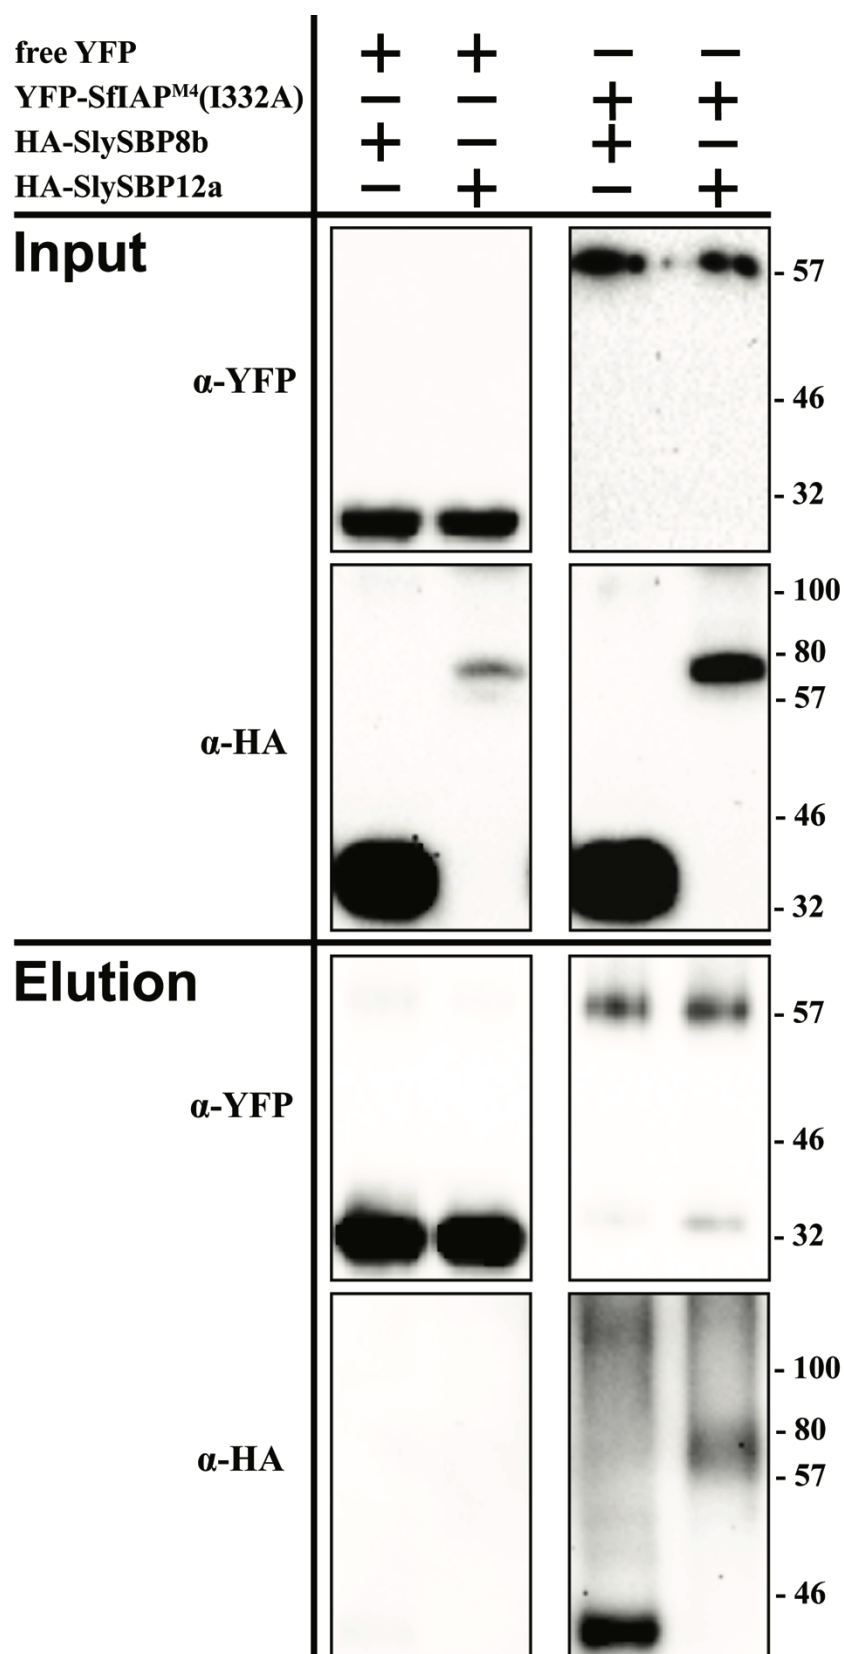

**Fig. 3**

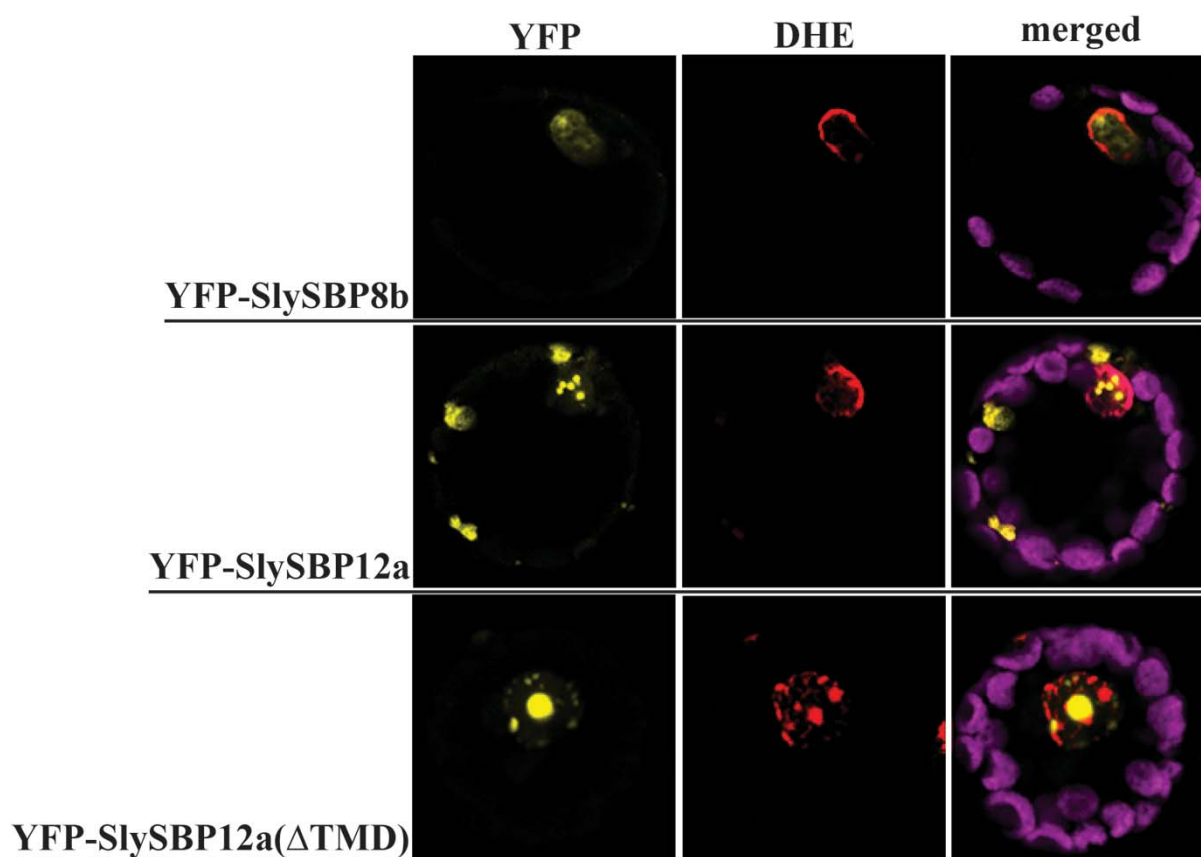

**Fig. 4**

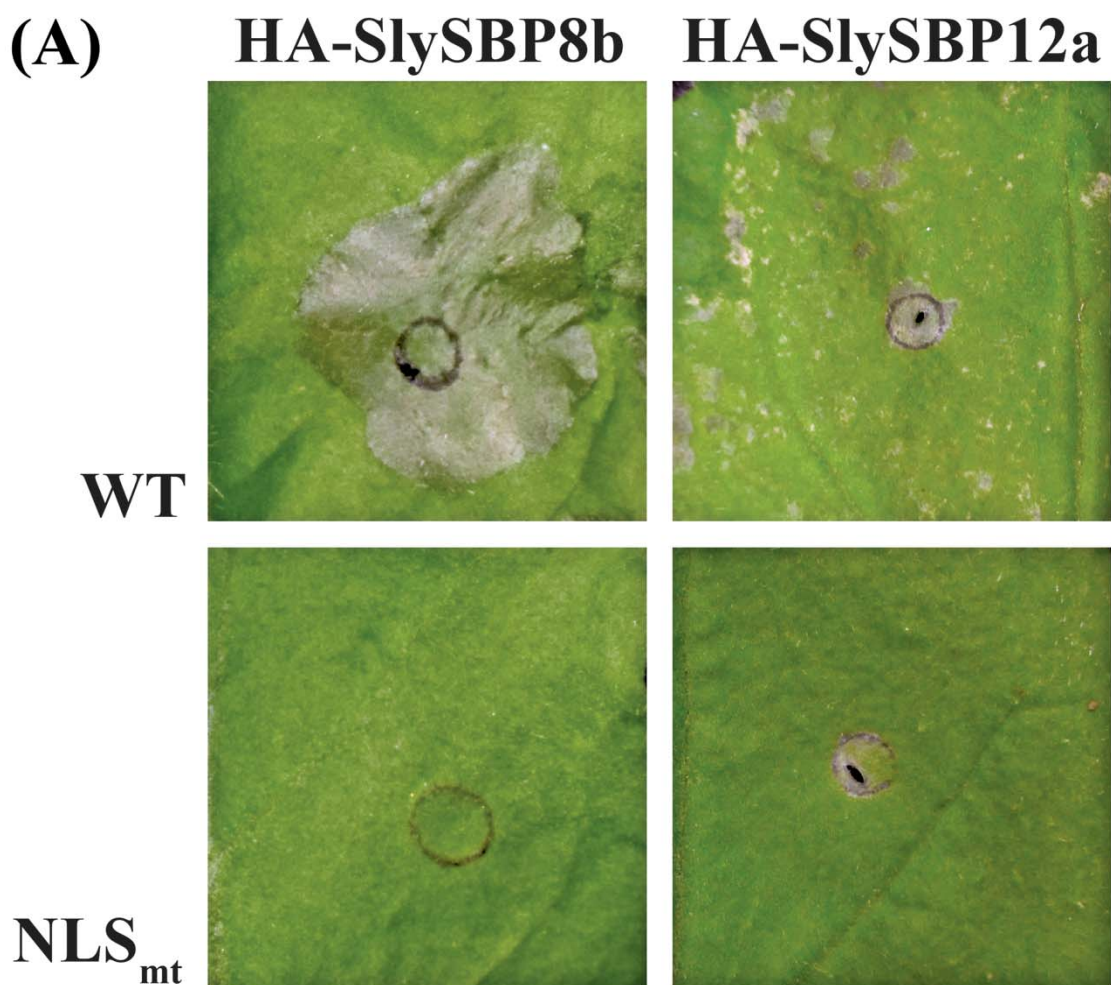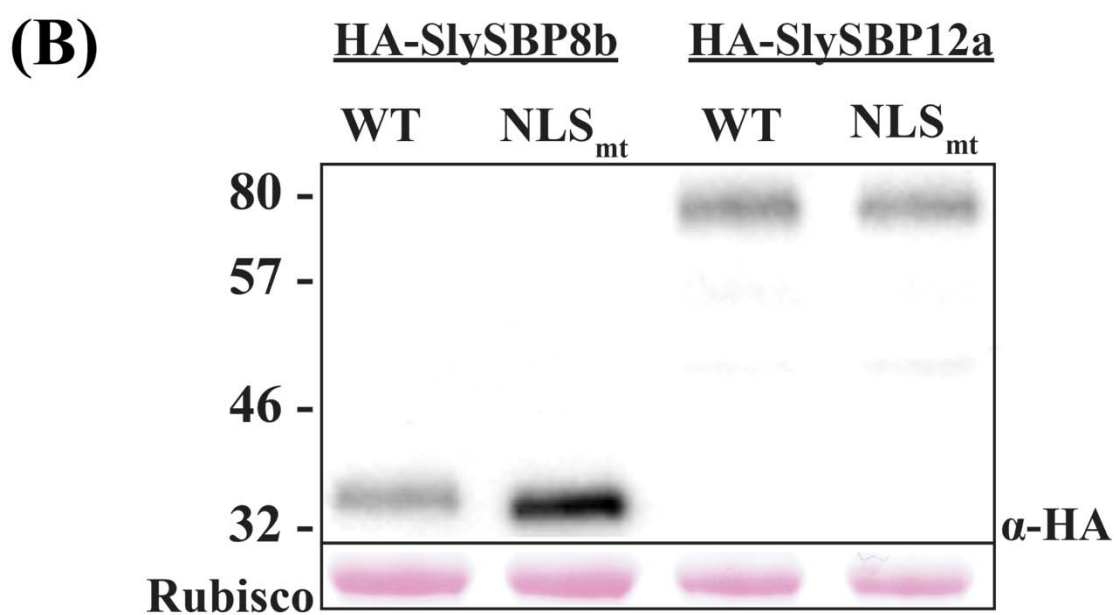



**Fig. 5**

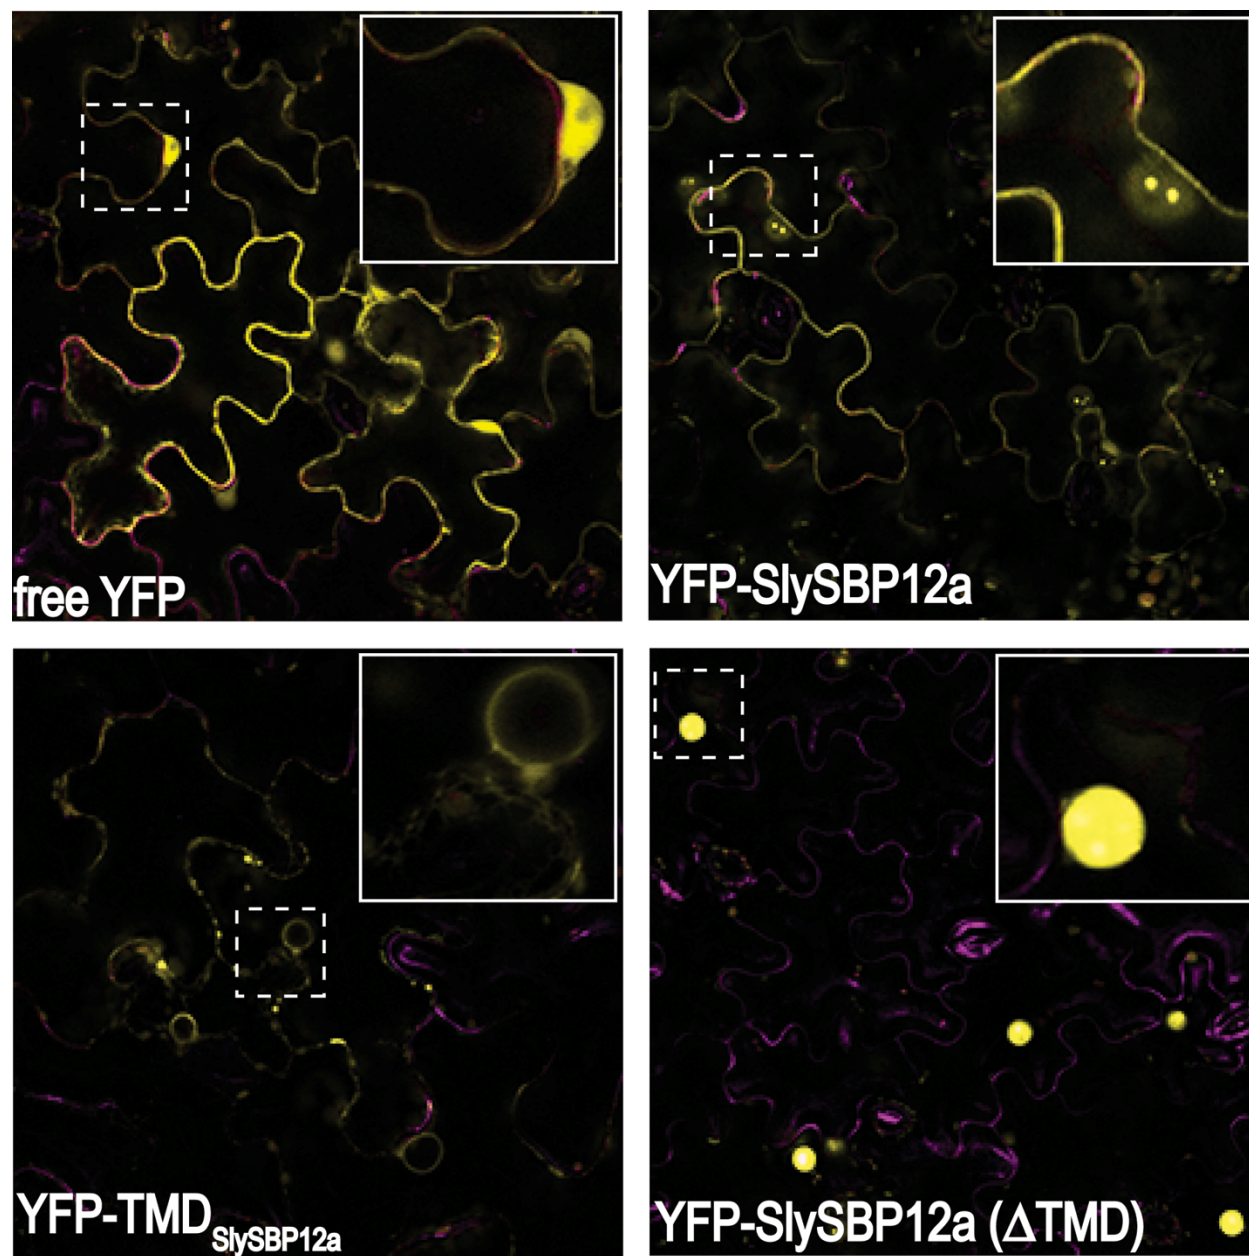

Fig. 6

(A)

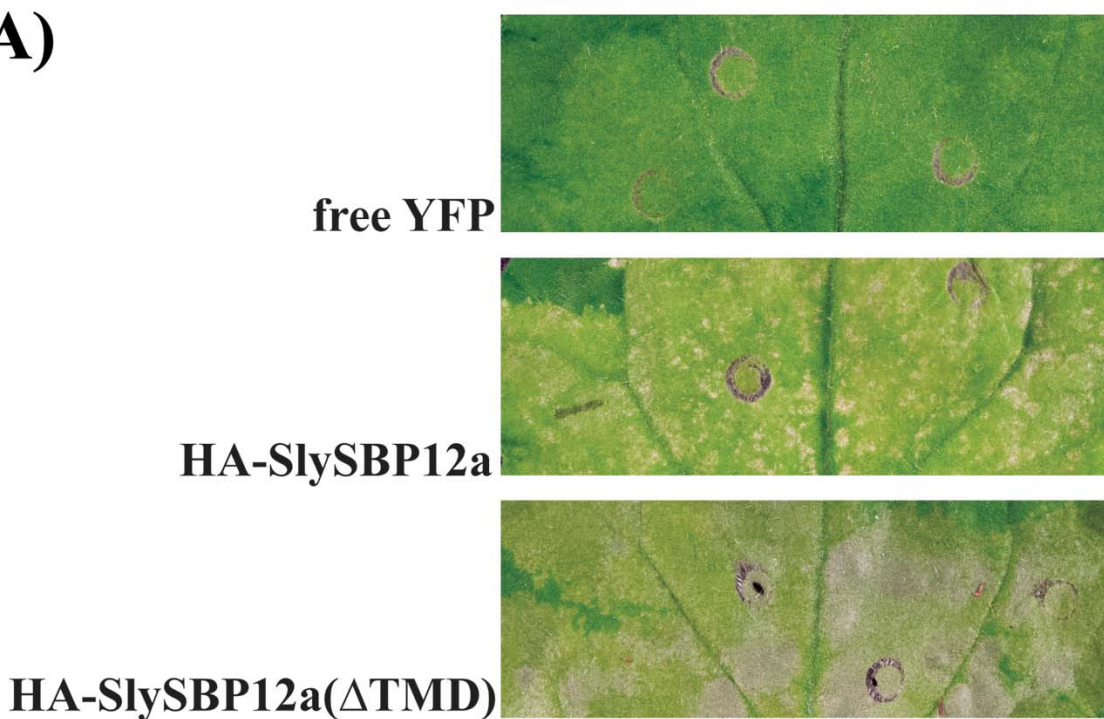

(B)

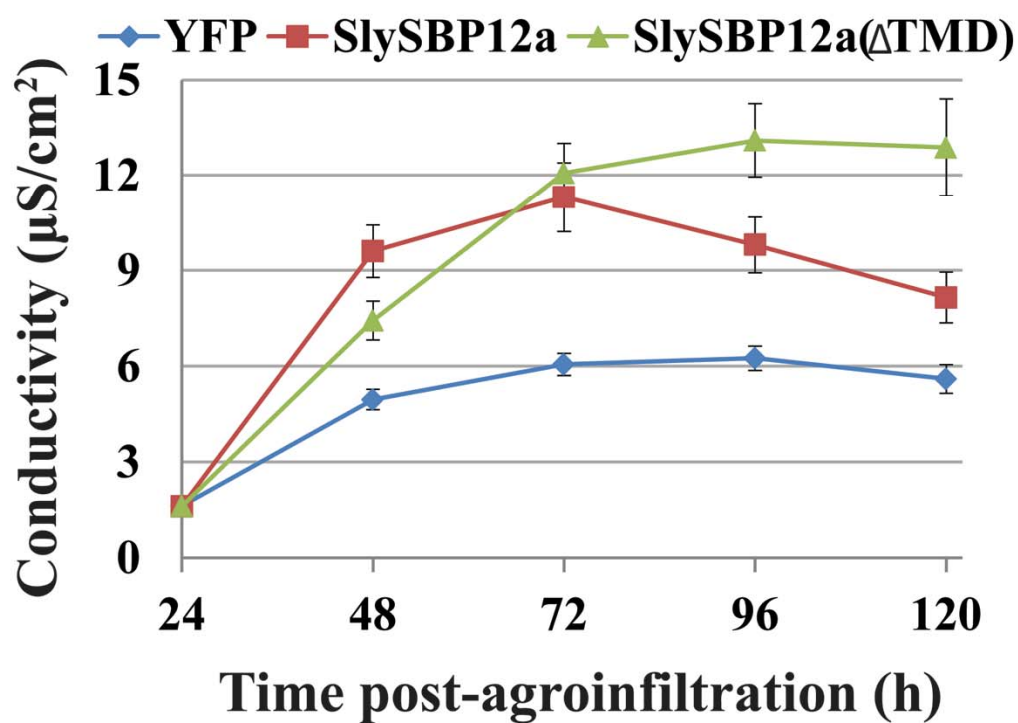

**Fig. 7**

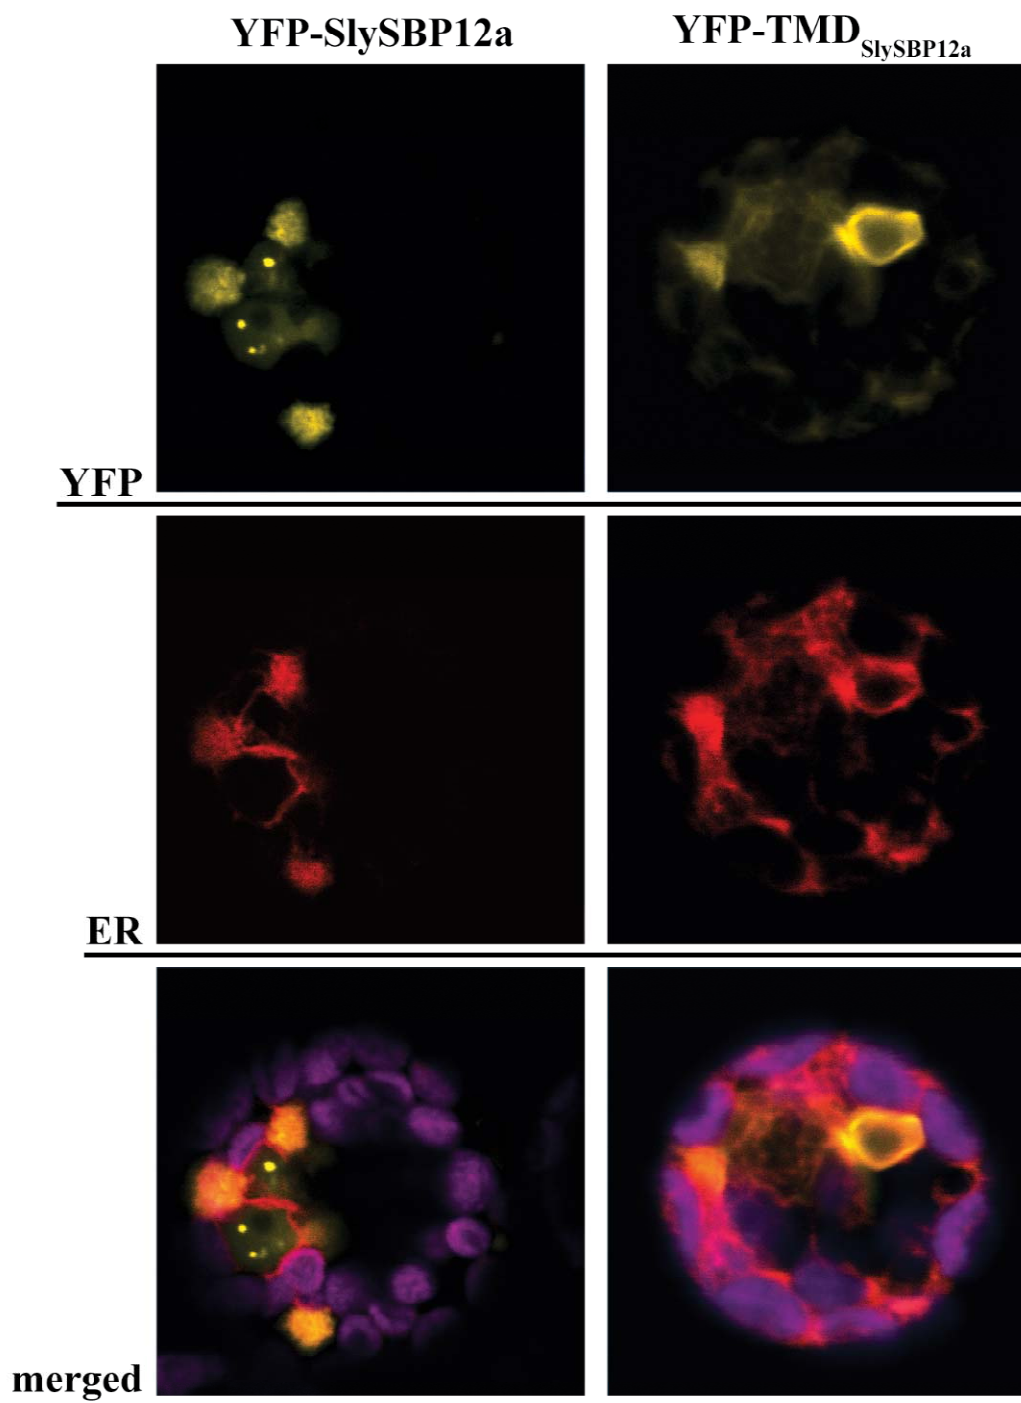



**Fig. 8**

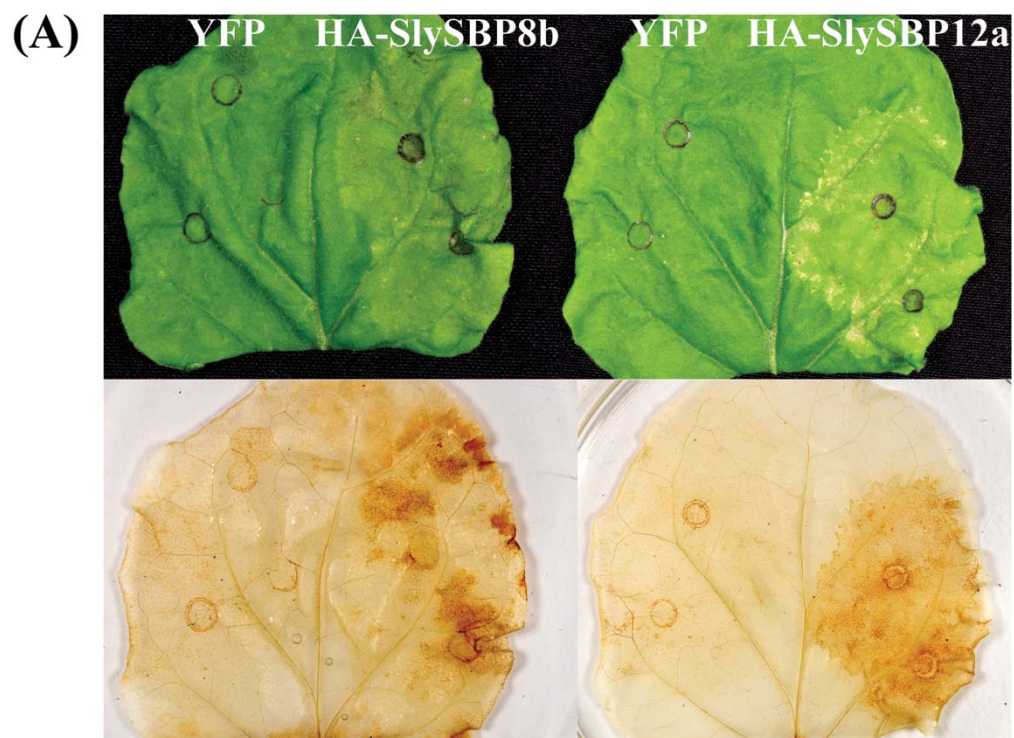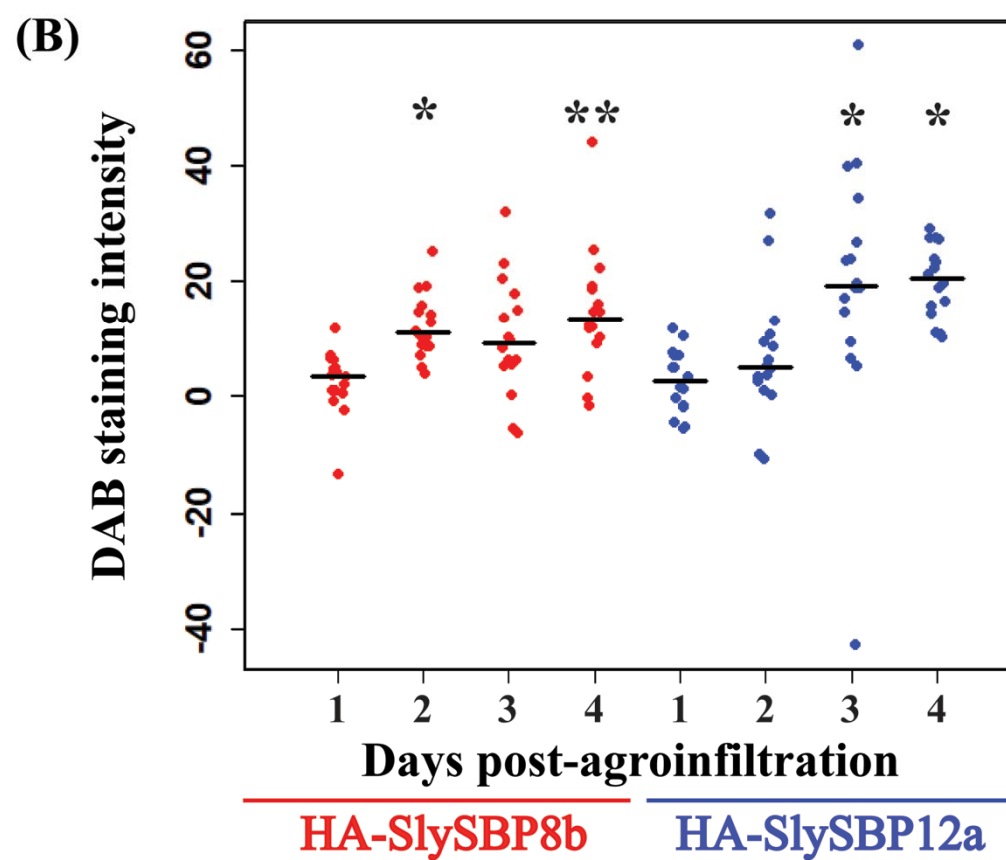

**Fig. 9**

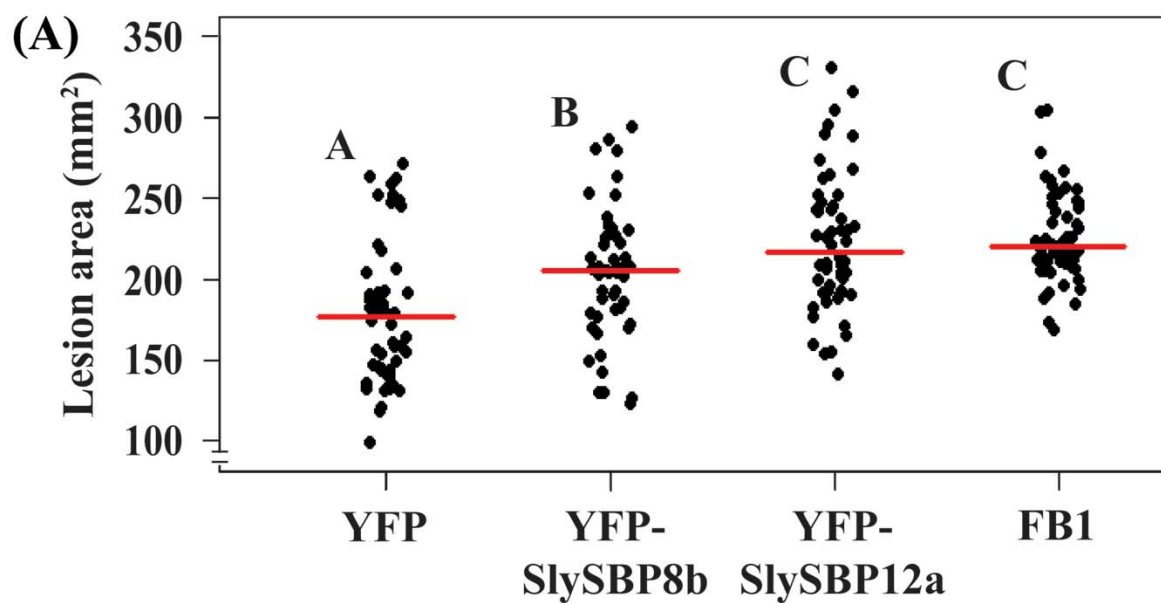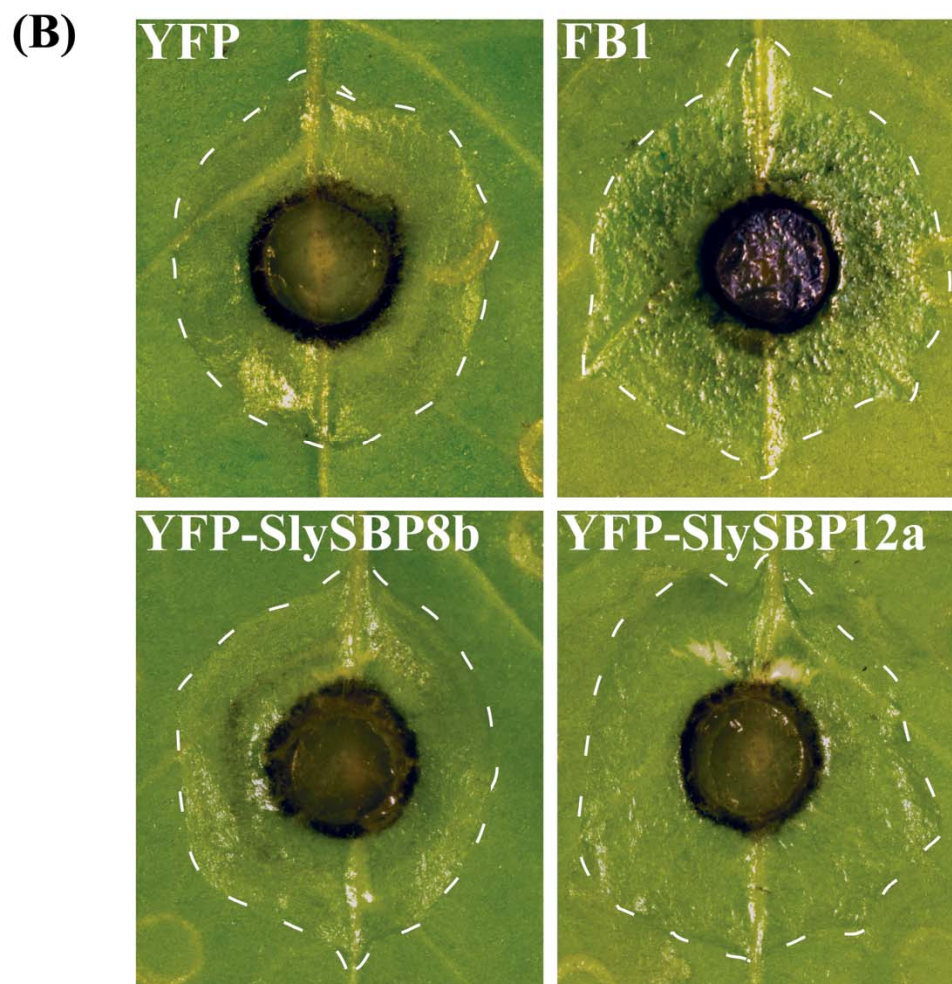

Source: https://www.biorxiv.org/content/10.1101/267435v1.full.pdf
